# Supplementary material
Source: PubMed Central journal article supplement (PMC7822569)
Supplement: aim-olf-M206569-M20-6569_Supplement1.pdf [file aim-olf-M206569-M20-6569_Supplement1.pdf]

## Supplementary Material\*

Bastos ML, Perlman-Arrow S, Menzies D, et al. The sensitivity and costs of testing for SARS-CoV-2 infection with saliva versus nasopharyngeal swabs. A systematic review and meta-analysis. *Ann Intern Med.* 2021. [Epub ahead of print]. doi:10.7326/M20-6569

|                                                                                                                                                                                                                                                            |    |
|------------------------------------------------------------------------------------------------------------------------------------------------------------------------------------------------------------------------------------------------------------|----|
| Supplement Table 1   Search Strategy.....                                                                                                                                                                                                                  | 2  |
| Supplement Table 2   Fields Extracted from Included Studies.....                                                                                                                                                                                           | 3  |
| Supplement Table 3   QUADAS-2 Adapted Quality Assessment Criteria.....                                                                                                                                                                                     | 4  |
| Supplement Table 4   Component Costs Used to Estimate the Total Cost of Nasopharyngeal and Saliva Sampling per Person Sampled for SARS-CoV-2.....                                                                                                          | 5  |
| Supplement Table 5   Cost Estimates Used to Arrive at Component Costs for SARS-CoV-2 Sampling, Sensitivity Estimates for Sampling Methods Among Persons Presenting for SARS-CoV-2 Testing, and the Probability Distribution Used for Each in Analysis..... | 6  |
| Supplement Table 6   Characteristics of Included Studies.....                                                                                                                                                                                              | 7  |
| Supplement Table 7   Patients' Characteristics for Included Studies.....                                                                                                                                                                                   | 11 |
| Supplement Table 8   Information on Laboratory Methods.....                                                                                                                                                                                                | 13 |
| Supplement Table 9   Detailed Collection Descriptions of Saliva Sample Collection Methods.....                                                                                                                                                             | 16 |
| Supplement Table 10   Transport Media Added to Saliva Samples.....                                                                                                                                                                                         | 18 |
| Supplement Table 11   Difference in Sensitivity for SARS-CoV-2 Between Nasopharyngeal Swabs and Saliva, Stratified by Population Sampled.....                                                                                                              | 19 |
| Supplement Table 12   Difference in Sensitivity to SARS-CoV-2 Between Nasopharyngeal Swabs and Saliva, Stratified by Symptoms Present at Time of Sampling.....                                                                                             | 21 |
| Supplement Table 13   Difference in Sensitivity to SARS-CoV-2 Between Nasopharyngeal Swabs and Saliva, Stratified by Setting.....                                                                                                                          | 23 |
| Supplement Table 14   Difference in Sensitivity to SARS-CoV-2 Between Nasopharyngeal Swabs and Saliva, Stratified by Age Group.....                                                                                                                        | 25 |
| Supplement Table 15   Difference in Sensitivity to SARS-CoV-2 Between Nasopharyngeal Swabs and Saliva, Stratified by Saliva Collection Method.....                                                                                                         | 27 |
| Supplement Table 16   Difference in Sensitivity to SARS-CoV-2 Between Nasopharyngeal Swabs and Saliva, Stratified by Usage of Transport Media with Saliva.....                                                                                             | 29 |
| Supplement Table 17   Difference in Sensitivity to SARS-CoV-2 Between Nasopharyngeal Swabs and Saliva, Stratified by Analytical Method Used.....                                                                                                           | 31 |
| Supplement Table 18   Difference in Sensitivity to SARS-CoV-2 Between Nasopharyngeal Swabs and Saliva, Stratified by Study Design.....                                                                                                                     | 33 |
| Supplement Table 19   Difference in Sensitivity to SARS-CoV-2 Between Nasopharyngeal Swabs and Saliva, Stratified by Quality Assessment.....                                                                                                               | 35 |
| Supplement Table 20   How the Incremental Cost per Additional SARS-CoV-2 Infection Identified Varies with Difference in Sampling Method Sensitivity and Prevalence of SARS-CoV-2.....                                                                      | 37 |
| Supplement Figure 1   Quality Assessment of Included Studies.....                                                                                                                                                                                          | 38 |
| Supplement Figure 2   Cost-Effectiveness Plane, Nasopharyngeal Swabs versus Saliva Sampling.....                                                                                                                                                           | 39 |
| References.....                                                                                                                                                                                                                                            | 40 |

\* This supplementary material was provided by the authors to give readers further details on their article. The material was reviewed but not copyedited.

Supplement Table 1 | Search Strategy

(Medline and Embase)

1. ((exp coronavirus/ or exp coronavirus infections/ or (betacoronavirus\* or beta coronavirus\* or coronavirus\* or corona virus\*).mp.) and (exp china/ or (china or chinese or hubei or wuhan).af.)) or (coronavirus\* or corona virus\* or betacoronavirus\* or beta coronavirus\*).ti,kf
2. (severe acute respiratory syndrome coronavirus or "SARS CoV-2" or cov2 or "sars 2" or COVID or "coronavirus 2" or covid19 or nCov or ((new or Novel) adj3 coronavirus\*) or ncp).ti,ab,kf. or ((exp pneumonia/ or pneumonia.ti,ab,kf.) and wuhan.af.)
3. ("COVID-19" or "coronavirus disease 2019").ti,ab,kf.
4. 1 or 2 or 3
5. (detect\* or diagnos\* or screen\* or technique\* or test\*).ti,ab,kf.
6. exp Nucleic Acid Amplification Techniques/
7. (PCR or (Polymerase adj2 "Chain Reaction\*") or nucleic acid\*).ti,ab,kf.
8. (Specimen\* or sample\* or swab\* or saliva\* or nasopharyngeal or NPS or pharyngeal or oropharyngeal or OPS).ti,ab,kf.
9. exp Saliva/
10. or/5-9
11. 4 and 10
12. 2020\*.dt,ez,da.
13. 11 and 12

Supplement Table 2 | Fields Extracted from Included Studies

| Field                                      | Variables Extracted                                                                                                                                                                                                                                                                                                                                                                                                                                                                        |
|--------------------------------------------|--------------------------------------------------------------------------------------------------------------------------------------------------------------------------------------------------------------------------------------------------------------------------------------------------------------------------------------------------------------------------------------------------------------------------------------------------------------------------------------------|
| <b>Study Characteristics</b>               |                                                                                                                                                                                                                                                                                                                                                                                                                                                                                            |
| Study Identifiers                          | Study ID, Title, Type of Publication (Peer Reviewed or Pre-Peer Review)                                                                                                                                                                                                                                                                                                                                                                                                                    |
| Study Design                               | Type of Study (Cohort selection cross-sectional accuracy study or Case-control selection cross-sectional accuracy study), Language, Study Location (Country and City), Time Period of Study (Month and Year),                                                                                                                                                                                                                                                                              |
| Index and Reference Tests Used             | Sampling Setting (Done/Instructed by Healthcare Professional or Self-Collected), Sample Collection Method, Media Added to Samples, Diagnostic Test Used (Lab based RT-PCR, Point of Care RT-PCR, Digital PCR, LAMP or Transcription Mediated Amplification) Type of Diagnostic Test (Commercial Lab-Based, Commercial Point-of-Care, In-House), Company Name and Machine (For Commercial Lab-Based Tests), Threshold for Positive RT-PCR, SARS-CoV-2 Gene Target, Sample Collection Period |
| Study Entry Criteria                       | Inclusion and Exclusion Criteria                                                                                                                                                                                                                                                                                                                                                                                                                                                           |
| <b>Patient Characteristics</b>             |                                                                                                                                                                                                                                                                                                                                                                                                                                                                                            |
| Clinical Characteristics of Population     | SARS-CoV-2 diagnosis (Persons with Confirmed SARS-CoV-2 and Negative Controls, Persons with Confirmed SARS-CoV-2, and/or Suspected Cases), Cohort Symptoms (Symptomatic and/or Asymptomatic), Clinical Setting (Inpatient and/or Outpatient), Disease Severity (Mild, Moderate and/or Severe), Time Since Symptom Onset                                                                                                                                                                    |
| Patients and Samples Included              | Total Patients Enrolled, Total Patients Included, Total Samples Included, Number of Samples Tested, Number Positive on Viral Culture, Number Positive on Any Test (Non-Viral Culture), Number Negative on Both Tests, Number Positive on Index Test, Number Positive on Reference Test, Number Asymptomatic                                                                                                                                                                                |
| Stratification by Disease Severity         | Definition of Disease Severity. For Asymptomatic, Mild, Moderate and Severe Included Patients: Number Positive on Viral Culture, Number Positive on Any Test (Non-Viral Culture), Number Negative on Both Tests, Number Positive on Index Test, Number Positive on Reference Test                                                                                                                                                                                                          |
| Stratification by Time Since Disease Onset | Definition of Time Since Symptom Onset. For First Week, Second Week, and Third Week Included Patients: Number Positive on Viral Culture, Number Positive on Any Test (Non-Viral Culture), Number Negative on Both Tests, Number Positive on Index Test, Number Positive on Reference Test                                                                                                                                                                                                  |
| Sex                                        | Number Male, Number Female                                                                                                                                                                                                                                                                                                                                                                                                                                                                 |
| Age                                        | Age Distribution (Young Children (0-4), Children (5-17), Adults (18-64), Elderly (65+)), Mean or Median (Including SD, IQR or Range)                                                                                                                                                                                                                                                                                                                                                       |

**Abbreviations:** RT-PCR: reverse transcription polymerase chain reaction, LAMP: Loop-mediated isothermal amplification, SARS-CoV-2: severe acute respiratory syndrome coronavirus

Supplement Table 3 | QUADAS-2 Adapted Quality Assessment Criteria

| Criteria Number                            | Question                                                                                                                                                                 |
|--------------------------------------------|--------------------------------------------------------------------------------------------------------------------------------------------------------------------------|
| <b>Patient Selection</b>                   |                                                                                                                                                                          |
| <b>A. Risk of Bias</b>                     |                                                                                                                                                                          |
| 1                                          | Was a consecutive or random sample of patients enrolled (Yes / No / Unclear)                                                                                             |
| 2                                          | Was a case-control design avoided? (Yes / No / Unclear)                                                                                                                  |
| 3                                          | Did the study avoid inappropriate exclusions (based on exclusion criteria) (Yes / No / Unclear)                                                                          |
| 4                                          | Could the selection of patients have introduced bias? (Low / High / Unclear)                                                                                             |
| <b>B. Concerns Regarding Applicability</b> |                                                                                                                                                                          |
| 5                                          | Is there concern that the included patients do not match the review question? (Low / High / Unclear)                                                                     |
| <b>Index Tests</b>                         |                                                                                                                                                                          |
| <b>A. Risk of Bias</b>                     |                                                                                                                                                                          |
| 6                                          | Were the index test results interpreted without knowledge of the results of the reference standard? (Yes / No / Unclear)                                                 |
| 7                                          | If a threshold was used, was it pre-specified? (Yes / No / Unclear)                                                                                                      |
| 8                                          | If interpretation of test was subjective (for e.g., color changes or line changes - only needed for LAMP), was agreement between readers described? (Yes / No / Unclear) |
| 9                                          | Could the conduct or interpretation of the index test have introduced bias (Low / High / Unclear)                                                                        |
| <b>B. Concerns Regarding Applicability</b> |                                                                                                                                                                          |
| 10                                         | Is there concern that the index test, its conduct, or interpretation differ from the review question (Low / High / Unclear)                                              |
| <b>Reference Tests</b>                     |                                                                                                                                                                          |
| <b>A. Risk of Bias</b>                     |                                                                                                                                                                          |
| 11                                         | Is the reference standard likely to correctly classify the target condition? (Yes / No / Unclear)                                                                        |
| 12                                         | Were the reference standard results interpreted without knowledge of the results of the index test? (Yes / No / Unclear)                                                 |
| 13                                         | Could the reference standard, its conduct, or its interpretation have introduced bias? (Low / High / Unclear)                                                            |
| <b>B. Concerns Regarding Applicability</b> |                                                                                                                                                                          |
| 14                                         | Is there concern that the target condition as defined by the reference standard does not match the review question? (Low / High / Unclear)                               |
| <b>Flow and Timing</b>                     |                                                                                                                                                                          |
| <b>A. Risk of Bias</b>                     |                                                                                                                                                                          |
| 15                                         | Did >=90% patients receive paired samples? (i.e., did >=90% people who could be included receive both saliva/pharyngeal tests) (Yes / No / Unclear)                      |
| 16                                         | Did patients receive the same reference standard? (i.e., different sampling technique oro- vs naso and/or different analytical method) (Yes / No / Unclear)              |
| 17                                         | Could the patient flow have introduced bias? (Low / High / Unclear)                                                                                                      |

Notes: Answers highlighted in green indicate those that would improve quality; answers highlighted in red indicate those that would reduce quality

Supplement Table 4 | Component Costs Used to Estimate the Total Cost of Nasopharyngeal and Saliva Sampling per Person Sampled for SARS-CoV-2

| <b>Parameter</b>                                                        | <b>Cost, 2020 \$USD<br/>(Per Person Sampled)</b> | <b>Reference</b>                               |
|-------------------------------------------------------------------------|--------------------------------------------------|------------------------------------------------|
| <b>Nasopharyngeal Sampling</b>                                          | <b>\$8.37</b>                                    |                                                |
| Nurse Time<br>(6 min)                                                   | \$3.78                                           | Government of Canada (1), Campbell, et al. (2) |
| Surgical Mask<br>(One per 20 persons sampled)                           | \$0.01                                           | Personal communication                         |
| Face Shield<br>(One per 20 persons sampled)                             | \$0.11                                           | Personal communication                         |
| Gloves<br>(2 per person sampled)                                        | \$0.17                                           | Personal communication                         |
| Gown<br>(1 per person sampled)                                          | \$1.50                                           | Personal communication                         |
| Swab and Transport Media<br>(1 per person sampled)                      | \$2.80                                           | Fisher Scientific (3)                          |
| <b>Saliva Sampling</b>                                                  | <b>\$2.04</b>                                    |                                                |
| Other Healthcare Professional or Administrative<br>Personnel<br>(4 min) | \$1.51                                           | Government of Canada (1), Campbell, et al. (2) |
| Surgical Mask<br>(One per 20 persons sampled)                           | \$0.01                                           | Personal communication                         |
| Gloves<br>(2 per person sampled)                                        | \$0.17                                           | Personal communication                         |
| Sterile Collection Cup<br>(1 per person sampled)                        | \$0.35                                           | Fisher Scientific (4)                          |

Supplement Table 5 | Cost Estimates Used to Arrive at Component Costs for SARS-CoV-2 Sampling, Sensitivity Estimates for Sampling Methods Among Persons Presenting for SARS-CoV-2 Testing, and the Probability Distribution Used for Each in Analysis

| <b>Parameter</b>                                                        | <b>Estimate</b> | <b>Probability Distribution Used</b> | <b>Probability Distribution Parameters</b> |
|-------------------------------------------------------------------------|-----------------|--------------------------------------|--------------------------------------------|
| Nurse (Hourly Wage)                                                     | \$37.79         | Gamma                                | Shape = 26.8; Scale = 0.97                 |
| Other Healthcare Professional or Administrative Personnel (Hourly Wage) | \$22.67         | Gamma                                | Shape = 26.8; Scale = 0.58                 |
| Surgical Mask (one)                                                     | \$0.11          | Gamma                                | Shape = 8.6; Scale = 0.011                 |
| Face Shield (one)                                                       | \$2.14          | Gamma                                | Shape = 47.1; Scale = 0.036                |
| Gloves (two)                                                            | \$0.17          | Gamma                                | Shape = 10.1; Scale = 0.013                |
| Gown (one)                                                              | \$1.50          | Gamma                                | Shape = 11.6; Scale = 0.105                |
| Swab and Transport Media (one)                                          | \$2.80          | Gamma                                | Shape = 38.7; Scale = 0.057                |
| Sterile Collection Cup (one)                                            | \$0.35          | Gamma                                | Shape = 9.3; Scale = 0.031                 |
| Difference in Sensitivity [Nasopharyngeal – Saliva] (%)                 | 7.9%            | Normal                               | Mean = 7.9; Standard Deviation = 4.49      |

Supplement Table 6 | Characteristics of Included Studies

| Study                     | Peer Reviewed (Yes, No) | City and Country       | Study Population                                                                                              | Time Period of Study | Setting (Inpatient, Outpatient)                          | Study Design             | Symptoms (Symptomatic, Asymptomatic)                       |
|---------------------------|-------------------------|------------------------|---------------------------------------------------------------------------------------------------------------|----------------------|----------------------------------------------------------|--------------------------|------------------------------------------------------------|
| Azzi, et al. (5)          | Yes                     | Varese, Italy          | Both persons presenting for SARS-CoV-2 testing and persons with confirmed SARS-CoV-2 (results not stratified) | 04/2020 - 05/2020    | Both inpatient and outpatient (results not stratified)   | Cohort                   | Both symptomatic and asymptomatic (results not stratified) |
| Chen, et al. (6)          | Yes                     | Hong Kong, China       | Persons with confirmed SARS-CoV-2                                                                             | NR                   | Inpatient (non-specified)                                | Cohort                   | Symptomatic                                                |
| Leung, et al. (7)         | Yes                     | Hong Kong, China       | Persons with confirmed SARS-CoV-2 (and negative controls)                                                     | 02/2020 - 03/2020    | Inpatient (non-specified setting)                        | Case-control (unmatched) | Symptomatic                                                |
| McCormick-Baw, et al. (8) | Yes                     | Dallas, USA            | Both persons presenting for SARS-CoV-2 testing and persons with confirmed SARS-CoV-2 (results not stratified) | NR                   | Inpatient (non-ICU only: hospitalized or emergency room) | Cohort                   | Symptomatic                                                |
| Rao, et al. (9)           | Yes                     | Kuala Lumpur, Malaysia | Persons with confirmed SARS-CoV-2                                                                             | NR                   | Both inpatient and outpatient (results not stratified)   | Cohort                   | Asymptomatic                                               |
| Landry, et al. (10)       | Yes                     | New Haven, USA         | Persons presenting for SARS-CoV-2 testing                                                                     | 04/2020              | Outpatient                                               | Cohort                   | Symptomatic                                                |
| Villar, et al. (11)       | Yes                     | Rio de Janeiro, Brazil | Persons presenting for SARS-CoV-2 testing                                                                     | NR                   | Outpatient                                               | Cohort                   | Both symptomatic and asymptomatic (stratified results)     |
| Akgun Dogan, et al. (12)  | No                      | Istanbul, Turkey       | Persons presenting for SARS-CoV-2 testing                                                                     | NR                   | Inpatient (non-ICU only: hospitalized or emergency room) | Cohort                   | Symptomatic                                                |
| Becker, et al. (13)       | No                      | California, USA        | Persons with confirmed SARS-CoV-2<br>Persons presenting for SARS-CoV-2 testing                                | 03/2020 - 04/2020    | Outpatient                                               | Cohort                   | Symptomatic                                                |
| Byrne, et al. (14)        | Yes                     | Liverpool, UK          | Persons presenting for SARS-CoV-2 testing                                                                     | 04/2020 - 06/2020    | Both inpatient and outpatient (results not stratified)   | Cohort                   | Symptomatic                                                |

| Study                     | Peer Reviewed (Yes, No) | City and Country     | Study Population                                                                                              | Time Period of Study | Setting (Inpatient, Outpatient)                        | Study Design | Symptoms (Symptomatic, Asymptomatic)                       |
|---------------------------|-------------------------|----------------------|---------------------------------------------------------------------------------------------------------------|----------------------|--------------------------------------------------------|--------------|------------------------------------------------------------|
| Griesemer, et al. (15)    | No                      | Albany, USA          | Persons presenting for SARS-CoV-2 testing                                                                     | 03/2020              | Outpatient                                             | Cohort       | Both symptomatic and asymptomatic (results not stratified) |
| Hanson, et al. (16)       | Yes                     | Salt Lake City, USA  | Persons presenting for SARS-CoV-2 testing                                                                     | 05/2020-06/2020      | Outpatient                                             | Cohort       | Symptomatic                                                |
| Iwasaki, et al. (17)      | Yes                     | Sapporo, Japan       | *Both persons presenting for SARS-CoV-2 testing and persons with confirmed SARS-CoV-2 (stratified results)    | NR                   | Both inpatient and outpatient (results not stratified) | Cohort       | Both symptomatic and asymptomatic (results not stratified) |
| Jamal, et al. (18)        | Yes                     | Toronto, Canada      | Persons with confirmed SARS-CoV-2                                                                             | 03/2020 to NR        | Inpatient (ICU and non-ICU)                            | Cohort       | Symptomatic                                                |
| Miller, et al. (19)       | No                      | New York, USA        | Persons with confirmed SARS-CoV-2                                                                             | NR                   | Outpatient                                             | Cohort       | Both symptomatic and asymptomatic (results not stratified) |
| Pasomsub, et al. (20)     | Yes                     | Bangkok, Thailand    | Persons presenting for SARS-CoV-2 testing                                                                     | 03/2020 - 04/2020    | Outpatient                                             | Cohort       | Symptomatic                                                |
| Ranoa, et al. (21)        | No                      | Urbana, USA          | Persons presenting for SARS-CoV-2 testing                                                                     | NR                   | Outpatient                                             | Cohort       | Both symptomatic and asymptomatic (results not stratified) |
| Wyllie, et al. (22)       | Yes                     | New Haven, USA       | Persons with confirmed SARS-CoV-2                                                                             | NR                   | Inpatient (non-specified)                              | Cohort       | Symptomatic                                                |
| Bhattacharya, et al. (23) | No                      | Bhubaneswar, India   | Persons presenting for SARS-CoV-2 testing                                                                     | NR                   | Inpatient (non-specified)                              | Cohort       | Symptomatic                                                |
| Goldfarb, et al. (24)     | No                      | Vancouver, Canada    | Both persons presenting for SARS-CoV-2 testing and persons with confirmed SARS-CoV-2 (results not stratified) | 05/2020-09/2020      | Outpatient                                             | Cohort       | Symptomatic                                                |
| Ku, et al. (25)           | No                      | Singapore, Singapore | Persons with confirmed SARS-CoV-2                                                                             | NR                   | Inpatient (non-specified)                              | Cohort       | Both symptomatic and asymptomatic (stratified results)     |



| Study                  | Peer Reviewed (Yes, No) | City and Country   | Study Population                                                               | Time Period of Study | Setting (Inpatient, Outpatient)                                      | Study Design | Symptoms (Symptomatic, Asymptomatic)                       |
|------------------------|-------------------------|--------------------|--------------------------------------------------------------------------------|----------------------|----------------------------------------------------------------------|--------------|------------------------------------------------------------|
| Nacher, et al (26)     | No                      | French Guiana      | Persons presenting for SARS-CoV-2 testing                                      | 07/2020 - 09/2020    | Outpatient                                                           | Cohort       | Both symptomatic and asymptomatic (results not stratified) |
| Sahajpal, et al. (27)  | No                      | Augusta, USA       | Persons presenting for SARS-CoV-2 testing                                      | NR                   | Both inpatient and outpatient (results not stratified)               | Cohort       | Both symptomatic and asymptomatic (results not stratified) |
| Teo, et al. (28)       | No                      | Lucence, Singapore | Persons presenting for SARS-CoV-2 testing<br>Persons with confirmed SARS-CoV-2 | 06/2020              | Outpatient                                                           | Cohort       | Both symptomatic and asymptomatic (stratified results)     |
| Yee, et al. (29)       | No                      | Los Angeles, USA   | Persons presenting for SARS-CoV-2 testing<br>Persons with confirmed SARS-CoV-2 | 06/2020-08/2020      | Outpatient<br>Both inpatient and outpatient (results not stratified) | Cohort       | Both symptomatic and asymptomatic (stratified results)     |
| Yokota, et al. (30)    | No                      | Sapporo, Japan     | Persons with confirmed SARS-CoV-2                                              | 06/2020-08/2020      | Inpatient (non-specified)                                            | Cohort       | Symptomatic                                                |
| Yokota, et al. (31)    | Yes                     | Sapporo, Japan     | Persons presenting for SARS-CoV-2 testing                                      | 06/2020 - 07/2020    | Outpatient                                                           | Cohort       | Asymptomatic                                               |
| Barat, et al. (32)     | No                      | Bethesda, USA      | Persons presenting for SARS-CoV-2 testing                                      | 07/2020-09/2020      | Outpatient                                                           | Cohort       | Both symptomatic and asymptomatic (results not stratified) |
| Aita, et al. (33)      | No                      | Padova, Italy      | Persons with confirmed SARS-CoV-2                                              | 04/2020              | Inpatient (ICU and non-ICU)                                          | Cohort       | Symptomatic                                                |
| Altawalah, et al. (34) | Yes                     | Kuwait             | Persons presenting for SARS-CoV-2 testing                                      | 07/2020              | Inpatient (non-specified)                                            | Cohort       | Symptomatic                                                |
| Binder, et al. (35)    | Yes                     | Durham, USA        | Persons with confirmed SARS-CoV-2                                              | 04/2020-05/2020      | Both inpatient and outpatient (stratified results)                   | Cohort       | Both symptomatic and asymptomatic (results not stratified) |

| Study                 | Peer Reviewed (Yes, No) | City and Country                  | Study Population                                                               | Time Period of Study | Setting (Inpatient, Outpatient)         | Study Design             | Symptoms (Symptomatic, Asymptomatic)                       |
|-----------------------|-------------------------|-----------------------------------|--------------------------------------------------------------------------------|----------------------|-----------------------------------------|--------------------------|------------------------------------------------------------|
| Caulley, et al. (36)  | Yes                     | Ottawa, Canada                    | Persons presenting for SARS-CoV-2 testing                                      | 04/2020-05/2020      | Outpatient                              | Cohort                   | Both symptomatic and asymptomatic (results not stratified) |
| Kojima, et al. (37)   | Yes                     | Los Angeles, USA                  | Persons with confirmed SARS-CoV-2 (and negative controls)                      | NR                   | Outpatient                              | Case-control (unmatched) | Both symptomatic and asymptomatic (results not stratified) |
| Procop, et al. (38)   | Yes                     | Cleveland USA                     | Persons presenting for SARS-CoV-2 testing                                      | NR                   | Outpatient                              | Cohort                   | Symptomatic                                                |
| Senok, et al. (39)    | Yes                     | Dubai, United Arab Emirates (UAE) | Persons presenting for SARS-CoV-2 testing                                      | 06/2020-07/2020      | Outpatient                              | Cohort                   | Both symptomatic and asymptomatic (stratified results)     |
| Uwamino, et al. (40)  | Yes                     | Tokyo Japan                       | Persons with confirmed SARS-CoV-2<br>Persons presenting for SARS-CoV-2 testing | 05/2020-07/2020      | Inpatient (non-specified)<br>Outpatient | Cohort                   | Symptomatic                                                |
| Migueres, et al. (41) | Yes                     | Toulouse, France                  | Persons with confirmed SARS-CoV-2<br>Persons presenting for SARS-CoV-2 testing | NR                   | Inpatient (non-specified)<br>Outpatient | Cohort                   | Both symptomatic and asymptomatic (stratified results)     |

**Abbreviations:** NR: Not reported, SARS-CoV-2: severe acute respiratory syndrome coronavirus 2

**Notes:** \*The group of persons presenting for SARS-CoV-2 testing was excluded in our stratified analyses, as zero patients were positive on either test.

Supplement Table 7 | Patients' Characteristics for Included Studies

| Study                     | N<br>Participants<br>Included | N Samples<br>Tested | Age in Years (mean/median)   | Male:Female | Symptom Severity                 |
|---------------------------|-------------------------------|---------------------|------------------------------|-------------|----------------------------------|
| Azzi, et al. (5)          | 122                           | 113                 | Mean: 53.5 (SD 19.8)         | 40:82       | Mild or moderate or severe       |
| Chen, et al. (6)          | 58                            | 58                  | Median: 38 (IQR 31 – 52)     | 28:30       | NR                               |
| Leung, et al. (7)         | 62                            | 95                  | Mean: 42 (SD 17.1)           | 26:36       | NR                               |
| McCormick-Baw, et al. (8) | 156                           | 155                 | Mean: 47.8                   | 90:66       | NR                               |
| Rao, et al. (9)           | 217                           | 217                 | Median: 27 (IQR 18-36)       | 217:0       | NR                               |
| Landry, et al. (10)       | 124                           | 124                 | NR                           | NR          | NR                               |
| Villar, et al. (11)       | 13                            | 13                  | NR                           | NR          | NR                               |
| Akgun Dogan, et al. (12)  | 200                           | 200                 | Mean: 54.9 (SD 16.1)         | 106:94      | Mild or moderate or severe       |
| Becker, et al. (13)       | 111                           | 109                 | NR                           | NR          | NR                               |
| Byrne, et al. (14)        | 110                           | 110                 | NR                           | 49:61       | NR                               |
| Griesemer, et al. (15)    | 463                           | 463                 | NR                           | 248:216     | NR                               |
| Hanson, et al. (16)       | 368                           | 354                 | Mean: 35 (range 18-75)       | 195:173     | NR                               |
| Iwasaki, et al. (17)      | 76                            | 76                  | Median: 69 (range 30-97)     | NR          | Mild and moderate                |
| Jamal, et al. (18)        | 53                            | 91                  | Median: 63 (range 27-106)    | 32:21       | Mild or moderate or severe       |
| Miller, et al. (19)       | 91                            | 91                  | NR                           | NR          | NR                               |
| Pasomsub, et al. (20)     | 200                           | 200                 | Median: 36 (IQR 28-48)       | 69:131      | NR                               |
| Ranoa, et al. (21)        | 100                           | 99                  | NR                           | NR          | NR                               |
| Wyllie, et al. (22)       | 142                           | 97                  | NR                           | 21:41       | Asymptomatic, severe or critical |
| Bhattacharya, et al. (23) | 74                            | 74                  | NR                           | NR          | Mild                             |
| Goldfarb, et al. (24)     | 50                            | 38                  | Median: 25.1 (IQR 13.6-35.9) | 22:28       | NR                               |
| Ku, et al. (25)           | 42                            | 42                  | NR                           | 40:2        | NR                               |
| Nacher, et al. (26)       | 776                           | 776                 | Mean: 40 (SD 16.8)           | NR          | Mild                             |
| Sahajpal, et al. (27)     | 240                           | 240                 | NR                           | NR          | NR                               |
| Teo, et al. (28)          | 200                           | 337                 | NR                           | NR          | Mild or moderate or severe       |
| Yee, et al. (29)          | 300                           | 300                 | NR                           | NR          | NR                               |
| Yokota, et al. (30)       | 42                            | 42                  | Median: 73 (range 27-93)     | 25:17       | NR                               |
| Yokota, et al. (31)       | 161                           | 161                 | Median: 44.9 (IQR 29.8-66.4) | NR          | NR                               |
| Barat, et al. (32)        | 449                           | 459                 | Median: 42 (range 21-88)     | 184:265     | NR                               |
| Aita, et al. (33)         | 49                            | 43                  | Median: 60 (range 25-94)     | 33:16       | NR                               |
| Altawalah, et al. (34)    | 891                           | 891                 | NR                           | NR          | NR                               |
| Binder, et al. (35)       | 19                            | 19                  | Median: 50 (range 29-91)     | NR          | NR                               |
| Caulley, et al. (36)      | 272                           | 272                 | NR                           | NR          | Mild                             |
| Kojima, et al. (37)       | 45                            | 45                  | Median: 42 (IQR 31-52)       | NR          | NR                               |
| Procop, et al. (38)       | 216                           | 216                 | Mean: 44 (range 18-82)       | NR          | NR                               |
| Senok, et al. (39)        | 401                           | 401                 | Mean: 35 (SD 9.5)            | 329:72      | NR                               |
| Uwamino, et al. (40)      | NR                            | 196                 | NR                           | NR          | NR                               |

| Study                 | N<br>Participants<br>Included | N Samples<br>Tested | Age in Years (mean/median) | Male:Female | Symptom Severity |
|-----------------------|-------------------------------|---------------------|----------------------------|-------------|------------------|
| Migueres, et al. (41) | 123                           | 123                 | Median: 43                 | 49:74       | NR               |

**Abbreviations:** NR: Not reported

Supplement Table 8 | Information on Laboratory Methods

| Study                     | Index Test                                                      |                   |                                      |                                     |          | Reference Test            |                  |                                      |                                     |          |
|---------------------------|-----------------------------------------------------------------|-------------------|--------------------------------------|-------------------------------------|----------|---------------------------|------------------|--------------------------------------|-------------------------------------|----------|
|                           | Saliva Sampling Method                                          | Instructed by HCW | Diagnostic Testing Method            | Gene Target                         | Ct-value | Swab type                 | Collected by HCW | Diagnostic Testing Method            | Gene Target                         | Ct-value |
| Azzi, et al. (5)          | Drooling technique                                              | Yes               | Lab based RT-PCR                     | 5'UTR region                        | NR       | NPS                       | Yes              | Lab based RT-PCR                     | Rdp, E, and N                       | NR       |
| Chen, et al. (6)          | Early-morning posterior oropharyngeal saliva spitting technique | Yes               | Point of care RT-PCR (Xpert Xpress)  | E and N2                            | NR       | NPS                       | Yes              | Point of care RT-PCR (Xpert Xpress)  | E and N2                            | NR       |
| Leung, et al. (7)         | Early-morning posterior oropharyngeal saliva spitting technique | Yes               | Lab based RT-PCR                     | E; positive samples tested for RdRp | NR       | NPS                       | Yes              | Lab based RT-PCR                     | E; positive samples tested for RdRp | NR       |
| McCormick-Baw, et al. (8) | General spitting technique                                      | Yes               | Point of care RT-PCR (Xpert Xpress)  | E and N2                            | NR       | NPS                       | Yes              | Point of care RT-PCR (Xpert Xpress)  | E and N2                            | NR       |
| Rao, et al. (9)           | Early-morning posterior oropharyngeal saliva spitting technique | Yes               | Lab based RT-PCR                     | E and RdRp                          | Ct < 38. | NPS                       | Yes              | Lab based RT-PCR                     | E and RdRp                          | Ct < 38. |
| Landry, et al. (10)       | General spitting technique                                      | Yes               | Lab based RT-PCR                     | N1 and N2                           | NR       | NPS                       | Yes              | Lab based RT-PCR                     | N1 and N2                           | NR       |
| Villar, et al. (11)       | Using a swabbing device                                         | Yes               | Lab based RT-PCR                     | N1 and N2                           | NR       | NPS                       | NR               | Lab based RT-PCR                     | N1 and N2                           | NR       |
| Akgun Dogan, et al. (12)  | Drooling technique                                              | Yes               | Lab based RT-PCR                     | ORF1ab and N                        | Ct ≤29   | NPS                       | Yes              | Lab based RT-PCR                     | ORF1ab and N                        | Ct ≤ 29  |
| Becker, et al. (13)       | General spitting technique                                      | Yes               | Lab based RT-PCR                     | ORF1ab                              | NR       | NPS                       | Yes              | Lab based RT-PCR                     | ORF1ab                              | NR       |
| Byrne, et al. (14)        | General spitting technique                                      | Yes               | Lab based RT-PCR                     | ORF1ab                              | Ct < 40  | Nasal throat <sup>1</sup> | Yes              | Lab based RT-PCR                     | ORF1ab                              | Ct < 40  |
| Griesemer, et al. (15)    | General spitting technique                                      | Yes               | Lab based RT-PCR                     | N1                                  | Ct < 45  | NPS                       | Yes              | Lab based RT-PCR                     | N1                                  | Ct < 45  |
| Hanson, et al. (16)       | General spitting technique                                      | Yes               | Transcription Mediated Amplification | NR                                  | NA       | NPS                       | Yes              | Transcription Mediated Amplification | NR                                  | NA       |
| Iwasaki, et al. (17)      | General spitting technique                                      | Yes               | Lab based RT-PCR                     | N2                                  | NR       | NPS                       | Yes              | Lab based RT-PCR                     | N2                                  | NR       |
| Jamal, et al. (18)        | General spitting technique                                      | Yes               | Lab based RT-PCR                     | RdRp, E and N                       | NR       | NPS                       | Yes              | Lab based RT-PCR                     | RdRp, E and N                       | NR       |

| Study                     | Index Test                                 |                   |                           |               |          | Reference Test |                  |                           |               |          |
|---------------------------|--------------------------------------------|-------------------|---------------------------|---------------|----------|----------------|------------------|---------------------------|---------------|----------|
|                           | Saliva Sampling Method                     | Instructed by HCW | Diagnostic Testing Method | Gene Target   | Ct-value | Swab type      | Collected by HCW | Diagnostic Testing Method | Gene Target   | Ct-value |
| Miller, et al. (19)       | General spitting technique                 | Yes               | Lab based RT-PCR          | N1 and N2     | NR       | NPS            | Yes              | Lab based RT-PCR          | N1 and N2     | NR       |
| Pasomsub, et al. (20)     | General spitting technique                 | Yes               | Lab based RT-PCR          | ORF1ab and N  | Ct ≤ 38  | NPS            | Yes              | Lab based RT-PCR          | ORF1ab and N  | Ct ≤ 38  |
| Ranoa, et al. (21)        | Drooling technique                         | NR                | Lab based RT-PCR          | ORF1ab, S, N  | NR       | NPS            | NR               | Lab based RT-PCR          | ORF1ab, S, N  | NR       |
| Wyllie, et al. (22)       | General spitting technique                 | Yes               | Lab based RT-PCR          | N1 and N2     | Ct ≤ 38  | NPS            | Yes              | Lab based RT-PCR          | N1 and N2     | Ct ≤ 38  |
| Bhattacharya, et al. (23) | NR                                         | Yes               | Lab based RT-PCR          | ORF1 and E    | NR       | NPS            | Yes              | Lab based RT-PCR          | ORF1 and E    | NR       |
| Goldfarb, et al. (24)     | General spitting technique                 | Yes               | Lab based RT-PCR          | E and RdRP    | Ct < 40  | NPS            | Yes              | Lab based RT-PCR          | E and RdRP    | Ct < 40  |
| Ku, et al. (25)           | Posterior oropharyngeal spitting technique | Yes               | Lab based RT-PCR          | E             | NR       | NPS            | Yes              | Lab based RT-PCR          | E             | NR       |
| Nacher, et al. (26)       | General spitting technique                 | Yes               | Lab based RT-PCR          | N, RdRp and E | Ct < 35  | NPS            | Yes              | Lab based RT-PCR          | N, RdRp and E | Ct < 35  |
| Sahajpal, et al. (27)     | General spitting technique                 | Yes               | Lab based RT-PCR          | N and ORF1ab  | NR       | NPS            | Yes              | Lab based RT-PCR          | N and ORF1ab  | NR       |
| Teo, et al. (28)          | Posterior oropharyngeal spitting technique | Yes               | Lab based RT-PCR          | ORF1ab        | NR       | NPS            | Yes              | Lab based RT-PCR          | ORF1ab        | NR       |
| Yee, et al. (29)          | General spitting technique                 | Yes               | Lab based RT-PCR          | N, S, ORF1ab  | Ct < 40  | NPS            | Yes              | Lab based RT-PCR          | N, S, ORF1ab  | Ct < 40  |
| Yokota, et al. (30)       | General spitting technique                 | Yes               | Lab based RT-PCR          | N1 and N2     | Ct ≤ 40  | NPS            | Yes              | Lab based RT-PCR          | N1 and N2     | Ct ≤ 40  |
| Yokota, et al. (31)       | General spitting technique                 | Yes               | Lab based RT-PCR and LAMP | N2            | NR       | NPS            | Yes              | Lab based RT-PCR          | N2            | NR       |
| Barat, et al. (32)        | Drooling technique                         | Yes               | Lab based RT-PCR          | N1 and N2     | Ct < 40  | NPS            | Yes              | Lab based RT-PCR          | N1 and N2     | Ct < 40  |
| Aita, et al. (33)         | Using a swabbing device                    | Yes               | Lab based RT-PCR          | E             | NR       | NPS            | Yes              | Lab based RT-PCR          | E             | NR       |
| Altawalrah, et al. (34)   | Posterior oropharyngeal spitting technique | Yes               | Lab based RT-PCR          | ORF1ab, N, S  | Ct < 37  | NPS            | Yes              | Lab based RT-PCR          | ORF1ab, N, S  | Ct < 37  |

| Study                 | Index Test                                 |                   |                           |             |          | Reference Test |                  |                           |             |          |
|-----------------------|--------------------------------------------|-------------------|---------------------------|-------------|----------|----------------|------------------|---------------------------|-------------|----------|
|                       | Saliva Sampling Method                     | Instructed by HCW | Diagnostic Testing Method | Gene Target | Ct-value | Swab type      | Collected by HCW | Diagnostic Testing Method | Gene Target | Ct-value |
| Binder, et al. (35)   | Drooling technique                         | Yes               | Lab based RT-PCR          | N1 and N2   | Ct < 40  | NPS            | Yes              | Lab based RT-PCR          | N1 and N2   | Ct < 40  |
| Caulley, et al. (36)  | General spitting technique                 | Yes               | Lab based RT-PCR          | E           | Ct < 37  | NPS            | Yes              | Lab based RT-PCR          | N, E, RdRp  | Ct < 37  |
| Kojima, et al. (37)   | Using a swabbing device                    | Yes               | Lab based RT-PCR          | N1 and N2   | NR       | NPS            | Yes              | Lab based RT-PCR          | N1 and N2   | NR       |
| Procop, et al. (38)   | Posterior oropharyngeal spitting technique | Yes               | Lab based RT-PCR          | N1, N2, aN3 | NR       | NPS            | Yes              | Lab based RT-PCR          | N1, N2, aN3 | NR       |
| Senok, et al. (39)    | General spitting technique                 | Yes               | Lab based RT-PCR          | RdRp and N  | Ct < 40  | NPS            | Yes              | Lab based RT-PCR          | RdRp and N  | Ct < 40  |
| Uwamino, et al. (40)  | NR                                         | Yes               | Lab based RT-PCR          | N1 and N2   | NR       | NPS            | Yes              | Lab based RT-PCR          | N1 and N2   | NR       |
| Migueres, et al. (41) | General spitting technique                 | NR                | Lab based RT-PCR          | IP2, IP4    | NR       | NPS            | NR               | Lab based RT-PCR          | IP2, IP4    | NR       |

**Abbreviations:** NR: Not reported, SARS-CoV-2: severe acute respiratory syndrome coronavirus 2, RT-PCR: Reverse transcription polymerase chain reaction

Supplement Table 9 | Detailed Collection Descriptions of Saliva Sample Collection Methods

| Saliva Sample Collection Method                         | Detailed Collection Descriptions                                                                                                                                                                                                                                                                                                                                                                                                                                                                                                                                                                                                                                                                                                                                                                                                                                                                                                                                                                                                                                                                                                                                                                                                                                                                                                                                                                                                                                                                                                                                                                                                                                                                                                                                                                                                                                                                                                                                                                                                                                                                                                                                                                                                                                                                                                                                                                                                                                                                                                                                                                                                                                                                                                                                                                                          |
|---------------------------------------------------------|---------------------------------------------------------------------------------------------------------------------------------------------------------------------------------------------------------------------------------------------------------------------------------------------------------------------------------------------------------------------------------------------------------------------------------------------------------------------------------------------------------------------------------------------------------------------------------------------------------------------------------------------------------------------------------------------------------------------------------------------------------------------------------------------------------------------------------------------------------------------------------------------------------------------------------------------------------------------------------------------------------------------------------------------------------------------------------------------------------------------------------------------------------------------------------------------------------------------------------------------------------------------------------------------------------------------------------------------------------------------------------------------------------------------------------------------------------------------------------------------------------------------------------------------------------------------------------------------------------------------------------------------------------------------------------------------------------------------------------------------------------------------------------------------------------------------------------------------------------------------------------------------------------------------------------------------------------------------------------------------------------------------------------------------------------------------------------------------------------------------------------------------------------------------------------------------------------------------------------------------------------------------------------------------------------------------------------------------------------------------------------------------------------------------------------------------------------------------------------------------------------------------------------------------------------------------------------------------------------------------------------------------------------------------------------------------------------------------------------------------------------------------------------------------------------------------------|
| General Spitting Technique                              | <p>Participants spit saliva into a sterile container McCormick-Baw, et al. (8), Landry, et al. (10), Becker, et al. (13), Griesemer, et al. (15), Jamal, et al. (18), Miller, et al. (19), Pasomsub, et al. (20) Byrne, et al. (14), Hanson, et al. (16), Iwasaki, et al. (17), Wyllie, et al. (22), Goldfarb, et al. (24), Nacher, et al. (26) Sahajpal, et al. (27), Yee, et al. (29), Yokota, et al. (30), Yokota, et al. (31), Caulley, et al. (36), Senok, et al. (39), Migueres, et al. (41)</p> <p>Landry, et al., McCormick-Baw, et al, Miller, et al., as well as Wyllie, et al. specified that participants were instructed not to eat or drink for 30 minutes prior to sample collection. McCormick-Baw, et al. and Miller, et al. also specified that participants were instructed not to smoke or chew gum in that same time frame. Goldfarb, et al. specified that participants were instructed not to eat, drink, smoke, brush their teeth or chew gum 1 hour prior to sampling. Wyllie et al. specified their participants were also asked to avoid nasal sprays, but that water could be consumed up to 10 minutes before collection. Wyllie et al. specified that samples were collected upon waking up, before eating, drinking, or brushing teeth. Landry, et al., Griesemer, et al, Byrne, et al., Wyllie, et al., Goldfarb, et al., Nacher, et al., and Senok, et al. specified that they instructed participants to pool saliva in their mouth prior to spitting. Migueres, et al. specified that participants were instructed to salivate and swirl saliva in their mouths for a minimum of 30 seconds before collection. Hanson, et al., Wyllie, et al. and Goldfarb, et al. specified to spit repeatedly. Byrne, et al., Hanson, et al., McCormick-Baw, et al., Wyllie, et al., Goldfarb, et al., Caulley, et al., and Senok, et al. specified the amount of saliva collected: a minimum of 200 microliters for Byrne, et al. , a minimum of around 1 ml for Wyllie, et al., Hanson, et al. and McCormick-Baw, et al., a minimum of 5-10 ml for Goldfarb, et al., a minimum of 1 ml for Caulley, et al., and 2-4 ml for Senok, et al. Pasomsub, et al. and Griesemer et al specified that participants were asked not to cough prior to sample collection. Becker, et al., Byrne, et al, and Miller, et al. specified that patients performed the technique by aid of a funnel, with Becker, et al. using the Orasure Oragene®·Dx OGD-610 or OM-505 device (Oragene®·Dx, DNA Genotek, Canada) and Miller, et al. using the Orasure Oragene®·Dx OGD-510 device (Oragene®·Dx, DNA Genotek, Canada), following the manufacturer’s instructions . Caulley, et al., specified that participants used the OMNIgene•ORAL, OM-505 (DNA Genotek, Canada), following the manufacturer’s instructions.</p> |
| Drooling Technique                                      | <p>Participants passively drooled into a conical tube Azzi, et al. (5), Akgun Dogan, et al. (12), Ranoa, et al. (21), Barat, et al. (32), Binder, et al. (35). Barat, et al. (32). specified that participants were instructed not to cough or clear their throats. Four studies specified the amount of saliva collected; around 1 ml for Akgun Dogan, et al.(12), around 1 ml for Azzi, et al. (5), about 2 ml for Binder, et al., and 3-5 ml for Barat, et al. (32)</p>                                                                                                                                                                                                                                                                                                                                                                                                                                                                                                                                                                                                                                                                                                                                                                                                                                                                                                                                                                                                                                                                                                                                                                                                                                                                                                                                                                                                                                                                                                                                                                                                                                                                                                                                                                                                                                                                                                                                                                                                                                                                                                                                                                                                                                                                                                                                                |
| Early-Morning Posterior Oropharyngeal Saliva Collection | <p>Upon waking up, participants coughed up posterior oropharyngeal saliva by clearing their throat, and spit it into a sterile collection container, prior to eating, drinking or brushing their teeth (6, 7, 9). Rao, et al. and Chen, et al. specified the amount of saliva collected: 2ml in study for Rao, et al.(9) and approximately 1ml in for Chen, et al. (6).</p>                                                                                                                                                                                                                                                                                                                                                                                                                                                                                                                                                                                                                                                                                                                                                                                                                                                                                                                                                                                                                                                                                                                                                                                                                                                                                                                                                                                                                                                                                                                                                                                                                                                                                                                                                                                                                                                                                                                                                                                                                                                                                                                                                                                                                                                                                                                                                                                                                                               |



| Saliva Sample Collection Method        | Detailed Collection Descriptions                                                                                                                                                                                                                                                                                                                                                                                                                                                                                                                                                                                                                                                                                                                                                                                                                                                                                              |
|----------------------------------------|-------------------------------------------------------------------------------------------------------------------------------------------------------------------------------------------------------------------------------------------------------------------------------------------------------------------------------------------------------------------------------------------------------------------------------------------------------------------------------------------------------------------------------------------------------------------------------------------------------------------------------------------------------------------------------------------------------------------------------------------------------------------------------------------------------------------------------------------------------------------------------------------------------------------------------|
| Posterior Pharyngeal Saliva Collection | <p>Participants were asked to clear their throats or cough deeply before spitting into the collection tube Ku, et al. (25), Teo, et al. (28), Altawalah, et al. (34), Procop, et al. (38)</p> <p>Procop, et al. and Teo, et al. used a naso-oropharyngeal technique, in which participants were also asked to clear their noses, with Procop, et al. specifying that they should collect any secretions in their mouth. Teo, et al. specified that participants were asked not to eat, drink, brush teeth, use mouthwash, smoke or chew gum for 30 minutes before collection. They were also asked to tilt their heads back while clearing their throat and when clearing their nose. Procop, et al. specified to remove gum or candy from their mouth at least 5 minutes before the collection. Ku, et al. specified that participants were asked to pool saliva for 1-2 minutes and that 1-2 ml of saliva was collected</p> |
| Using a Saliva Collection Device       | <p>Participants used a swab to collect saliva. Villar, et al. (11), Aita, et al. (33), Kojima, et al. (37)</p> <p>Kojima et al. specified that participants were asked to cough deeply three to five times to collect any secretions, then swab their cheeks, above and below their tongue, along the gums and palate for a total of 20 second using a sterile swab. They then placed the swab in a tube containing RNA preservation media. Villar et al. and Aita et al. used the Salivette® device (Salivette, Sarstedt, Germany) manufacturer's instructions were followed. Participants chewed the Salivette® swab in their mouth for 1 minute to stimulating salivation, and then replaced swabs into the Salivette® tube. Tubes were centrifuged for 2 minutes at 1000g to release saliva from the swab.</p>                                                                                                            |

Supplement Table 10 | Transport Media Added to Saliva Samples

| Study                                                                                                                                                                                                                                                                                                                                                                              | Transport Media Added to Saliva Sample |
|------------------------------------------------------------------------------------------------------------------------------------------------------------------------------------------------------------------------------------------------------------------------------------------------------------------------------------------------------------------------------------|----------------------------------------|
| Azzi, et al. (5), McCormick-Baw, et al. (8), Rao, et al. (9), Landry, et al. (10), Villar, et al. (11), Byrne, et al. (14), Griesemer, et al. (15), Wyllie, et al. (22), Goldfarb, et al. (24), Ku, et al. (25), Nacher, et al. (26), Yee, et al. (29), Barat, et al. (32), Aita, et al. (33), Procop, et al. (38), Senok, et al. (39), Uwamino, et al. (40), Miguera, et al. (41) | No media                               |
| Chen, et al. (6), Leung, et al. (7), Akgun Dogan, et al. (12), Sahajpal, et al. (27), Altawalah, et al. (34)                                                                                                                                                                                                                                                                       | Viral transport media (VTM)            |
| Hanson, et al. (16), Pasomsab, et al. (20)                                                                                                                                                                                                                                                                                                                                         | Universal transport media (UTM)        |
| Becker, et al. (13), Miller, et al. (19), Teo, et al. (28), Caulley, et al. (36), Kojima, et al. (37)                                                                                                                                                                                                                                                                              | Nucleic acid stabilizing solution      |
| Jamal, et al. (18), Iwasaki, et al. (17), Yokota, et al. (30), Yokota, et al. (31), Binder, et al. (35)                                                                                                                                                                                                                                                                            | Phosphate-Buffered Saline (PBS)        |
| Ranoa, et al. (21)                                                                                                                                                                                                                                                                                                                                                                 | TE buffer                              |
| Bhattacharya, et al. (24)                                                                                                                                                                                                                                                                                                                                                          | NR                                     |
| <b>Abbreviations:</b> NR: Not reported                                                                                                                                                                                                                                                                                                                                             |                                        |

Supplement Table 11 | Difference in Sensitivity for SARS-CoV-2 Between Nasopharyngeal Swabs and Saliva, Stratified by Population Sampled

| Study                                                     | N Paired Samples Tested | N Positive on Nasopharyngeal swab | N Positive on Saliva | N Positive on Any Sample (Reference) | Sensitivity Saliva (95% CI)                        | Difference in Sensitivity (95% CI) [Saliva-Nasopharyngeal swab] |
|-----------------------------------------------------------|-------------------------|-----------------------------------|----------------------|--------------------------------------|----------------------------------------------------|-----------------------------------------------------------------|
| <b>People Presenting for SARS-CoV-2 Testing (N=22)</b>    |                         |                                   |                      |                                      |                                                    |                                                                 |
| Landry, et al. (10)                                       | 124                     | 33                                | 30                   | 35                                   | 85.7% (69.7% to 95.2%)                             | -8.6% (-24.6% to 7.3%)                                          |
| Villar, et al. (11)                                       | 13                      | 9                                 | 7                    | 9                                    | 77.8% (40% to 97.2%)                               | -22.2% (-54.7% to 11.7%)                                        |
| Akgun Dogan, et al. (12)                                  | 200                     | 58                                | 36                   | 63                                   | 57.1% (44% to 69.5%)                               | -34.9% (-49% to -18.4%)                                         |
| Becker, et al. (13)                                       | 85                      | 15                                | 11                   | 23                                   | 47.8% (26.8% to 69.4%)                             | -17.4% (-49.8% to 19.7%)                                        |
| Byrne, et al. (14)                                        | 110                     | 14                                | 12                   | 14                                   | 85.7% (57.2% to 98.2%)                             | -14.3% (-39.9% to 9.6%)                                         |
| Griesemer, et al. (15)                                    | 463                     | 103                               | 87                   | 105                                  | 82.9% (74.3% to 89.5%)                             | -15.2% (-23.8% to -7.3%)                                        |
| Hanson, et al. (16)                                       | 354                     | 80                                | 81                   | 86                                   | 94.2% (87% to 98.1%)                               | 1.2% (-7.1% to 9.5%)                                            |
| Pasomsub, et al. (20)                                     | 200                     | 19                                | 18                   | 21                                   | 85.7% (63.7% to 97%)                               | -4.8% (-27.1% to 17.8%)                                         |
| Ranoa, et al. (21)                                        | 99                      | 9                                 | 9                    | 9                                    | 100% (66.4% to 100%)                               | 0% (-29.9% to 29.9%)                                            |
| Bhattacharya, et al. (23)                                 | 74                      | 58                                | 53                   | 58                                   | 91.4% (81% to 97.1%)                               | -8.6% (-18.6% to -0.7%)                                         |
| Nacher, et al. (26)                                       | 776                     | 152                               | 86                   | 162                                  | 53.1% (45.1% to 61%)                               | -40.7% (-49.5% to -30.9%)                                       |
| Sahajpal, et al. (27)                                     | 240                     | 61                                | 34                   | 68                                   | 50% (37.6% to 62.4%)                               | -39.7% (-53.9% to -22.5%)                                       |
| Teo, et al. (28)                                          | 190                     | 50                                | 95                   | 98                                   | 96.9% (91.3% to 99.4%)                             | 45.9% (34% to 56.2%)                                            |
| Yee, et al. (29)                                          | 70                      | 62                                | 57                   | 70                                   | 81.4% (70.3% to 89.7%)                             | -7.1% (-20% to 5.9%)                                            |
| Barat, et al. (32)                                        | 451                     | 29                                | 26                   | 30                                   | 86.7% (69.3% to 96.2%)                             | -10% (-26.8% to 6.1%)                                           |
| Altawalah, et al. (34)                                    | 891                     | 344                               | 305                  | 362                                  | 84.3% (80.1% to 87.9%)                             | -10.8% (-15.4% to -6.2%)                                        |
| Caulley, et al. (36)                                      | 272                     | 8                                 | 11                   | 13                                   | 84.6% (54.6% to 98.1%)                             | 23.1% (-16% to 54.6%)                                           |
| Procop, et al. (38)                                       | 216                     | 38                                | 39                   | 39                                   | 100% (91% to 100%)                                 | 2.6% (-6.6% to 13.2%)                                           |
| Senok, et al. (39)                                        | 401                     | 26                                | 28                   | 35                                   | 80% (63.1% to 91.6%)                               | 5.7% (-16.5% to 27.2%)                                          |
| Yokota, et al. (31)                                       | 161                     | 41                                | 44                   | 47                                   | 93.6% (82.5% to 98.7%)                             | 6.4% (-6.9% to 19.9%)                                           |
| Uwamino, et al. (40)                                      | 114                     | 2                                 | 2                    | 2                                    | 100% (15.8% to 100%)                               | 0% (-65.8% to 65.8%)                                            |
| Migueres, et al. (41)                                     | 95                      | 32                                | 29                   | 32                                   | 90.6% (75% to 98%)                                 | -9.4% (-24.2% to 3%)                                            |
| <b>Pooled estimate (95% CI); I<sup>2</sup></b>            | <b>5599</b>             | <b>1243</b>                       | <b>1100</b>          | <b>1381</b>                          | <b>85.4% (78.1% to 90.6%); I<sup>2</sup> = 89%</b> | <b>-7.9% (16.7% to 0.8%); I<sup>2</sup> = 89%</b>               |
| <b>Persons with Confirmed SARS-CoV-2 Infection (N=17)</b> |                         |                                   |                      |                                      |                                                    |                                                                 |
| Chen, et al. (6)                                          | 58                      | 55                                | 52                   | 58                                   | 89.7% (78.8% to 96.1%)                             | -5.2% (-16.4% to 5.7%)                                          |
| Leung, et al. (7)                                         | 95                      | 45                                | 51                   | 58                                   | 87.9% (76.7% to 95%)                               | 10.3% (-4.9% to 25.1%)                                          |
| Rao, et al. (9)                                           | 217                     | 84                                | 149                  | 160                                  | 93.1% (88% to 96.5%)                               | 40.6% (30.5% to 49.6%)                                          |
| Becker, et al. (13)                                       | 24                      | 6                                 | 4                    | 7                                    | 57.1% (18.4% to 90.1%)                             | -28.6% (-66.4% to 24.4%)                                        |
| Iwasaki, et al. (17)                                      | 10                      | 9                                 | 9                    | 10                                   | 90% (55.5% to 99.7%)                               | 0% (-32.4% to 32.4%)                                            |
| Jamal, et al. (18)                                        | 91                      | 64                                | 52                   | 72                                   | 72.2% (60.4% to 82.1%)                             | -16.7% (-30.2% to -2.4%)                                        |
| Miller, et al. (19)                                       | 91                      | 34                                | 35                   | 36                                   | 97.2% (85.5% to 99.9%)                             | 2.8% (-9.5% to 15.7%)                                           |
| Wyllie, et al. (22)                                       | 97                      | 56                                | 60                   | 72                                   | 83.3% (72.7% to 91.1%)                             | 5.6% (-8.9% to 19.7%)                                           |
| Ku, et al. (25)                                           | 42                      | 30                                | 21                   | 31                                   | 67.7% (48.6% to 83.3%)                             | -29% (-47.2% to -9%)                                            |
| Teo, et al. (28)                                          | 147                     | 100                               | 114                  | 122                                  | 93.4% (87.5% to 97.1%)                             | 11.5% (2.7% to 20.2%)                                           |
| Yee, et al. (29)                                          | 27                      | 25                                | 22                   | 27                                   | 81.5% (61.9% to 93.7%)                             | -11.1% (-30.7% to 9%)                                           |

| Study                                                                                                        | N Paired Samples Tested | N Positive on Nasopharyngeal swab | N Positive on Saliva | N Positive on Any Sample (Reference) | Sensitivity Saliva (95% CI)                  | Difference in Sensitivity (95% CI) [Saliva-Nasopharyngeal swab] |
|--------------------------------------------------------------------------------------------------------------|-------------------------|-----------------------------------|----------------------|--------------------------------------|----------------------------------------------|-----------------------------------------------------------------|
| Yokota, et al. (30)                                                                                          | 42                      | 34                                | 38                   | 38                                   | 100% (90.7% to 100%)                         | 10.5% (-0.6% to 24.1%)                                          |
| Aita, et al. (33)                                                                                            | 43                      | 7                                 | 8                    | 8                                    | 100% (63.1% to 100%)                         | 12.5% (-21.5% to 47.1%)                                         |
| Binder, et al. (35)                                                                                          | 19                      | 11                                | 11                   | 12                                   | 91.7% (61.5% to 99.8%)                       | 0% (-28.5% to 28.5%)                                            |
| Kojima, et al. (37)                                                                                          | 45                      | 23                                | 26                   | 29                                   | 89.7% (72.6% to 97.8%)                       | 10.3% (-10.5% to 30.4%)                                         |
| Uwamino, et al. (40)                                                                                         | 82                      | 45                                | 41                   | 56                                   | 73.2% (59.7% to 84.2%)                       | -7.1% (-24.4% to 10.7%)                                         |
| Migueres, et al. (41)                                                                                        | 28                      | 9                                 | 8                    | 12                                   | 66.7% (34.9% to 90.1%)                       | -8.3% (-45.5% to 32%)                                           |
| <b>Pooled estimate (95% CI); I<sup>2</sup></b>                                                               | 1158                    | 637                               | 701                  | 808                                  | 87.3% (81.3% to 91.6%); I <sup>2</sup> = 74% | 1.5% (-7.3% to 10.3%); I <sup>2</sup> = 78%                     |
| <b>Mixed Population: Persons with Confirmed SARS-CoV-2 or People Presenting for SARS-CoV-2 Testing (N=3)</b> |                         |                                   |                      |                                      |                                              |                                                                 |
| Azzi, et al. (5)                                                                                             | 113                     | 26                                | 55                   | 59                                   | 93.2% (83.5% to 98.1%)                       | 49.2% (31.3% to 62.9%)                                          |
| McCormick-Baw, et al. (8)                                                                                    | 155                     | 49                                | 48                   | 50                                   | 96% (86.3% to 99.5%)                         | -2% (-11.6% to 7.1%)                                            |
| Goldfarb, et al. (24)                                                                                        | 38                      | 28                                | 23                   | 29                                   | 79.3% (60.3% to 92%)                         | -17.2% (-35.4% to 1.1%)                                         |
| <b>Pooled estimate (95% CI); I<sup>2</sup></b>                                                               | 306                     | 103                               | 126                  | 138                                  | 91.4% (81.6% to 96.2%); I <sup>2</sup> = 50% | 9.8% (-7.6% to 95.6%); I <sup>2</sup> = 95%                     |

Abbreviations: N: Number, CI: Confidence Interval

Supplement Table 12 | Difference in Sensitivity to SARS-CoV-2 Between Nasopharyngeal Swabs and Saliva, Stratified by Symptoms Present at Time of Sampling

| Study                                          | N Paired Samples Tested | N Positive on Nasopharyngeal swab | N Positive on Saliva | N Positive on Any Sample (Reference) | Sensitivity Saliva (95% CI)                        | Difference in Sensitivity (95% CI) [Saliva-Nasopharyngeal] |
|------------------------------------------------|-------------------------|-----------------------------------|----------------------|--------------------------------------|----------------------------------------------------|------------------------------------------------------------|
| <b>Asymptomatic (N=8)</b>                      |                         |                                   |                      |                                      |                                                    |                                                            |
| Rao, et al. (9)                                | 217                     | 84                                | 149                  | 217                                  | 93.1% (88% to 96.5%)                               | 40.6% (30.5% to 49.6%)                                     |
| Yokota, et al. (31)                            | 161                     | 41                                | 44                   | 161                                  | 93.6% (82.5% to 98.7%)                             | 6.4% (-6.9% to 19.9%)                                      |
| Villar, et al. (11)                            | 7                       | 3                                 | 3                    | 7                                    | 100% (29.2% to 100%)                               | 0% (-56.1% to 56.1%)                                       |
| Ku, et al. (25)                                | 12                      | 6                                 | 1                    | 12                                   | 16.7% (0.4% to 64.1%)                              | -83.3% (-97% to -27.7%)                                    |
| Teo, et al. (28)                               | 149                     | 27                                | 64                   | 149                                  | 95.5% (87.5% to 99.1%)                             | 55.2% (39.3% to 67.2%)                                     |
| Yee, et al. (29)                               | 42                      | 36                                | 30                   | 42                                   | 71.4% (55.4% to 84.3%)                             | -14.3% (-32.7% to 5.6%)                                    |
| Senok, et al. (39)                             | 195                     | 12                                | 11                   | 195                                  | 73.3% (44.9% to 92.2%)                             | -6.7% (-38.4% to 26.8%)                                    |
| Migueraes, et al. (41)                         | 17                      | 17                                | 15                   | 17                                   | 88.2% (63.6% to 98.5%)                             | -11.8% (-34.3% to 8.5%)                                    |
| <b>Pooled estimate (95% CI); I<sup>2</sup></b> | <b>800</b>              | <b>226</b>                        | <b>317</b>           | <b>357</b>                           | <b>85.8% (69.6% to 94.1%); I<sup>2</sup> = 83%</b> | <b>-1.6% (-37.4% to 34.1%); I<sup>2</sup> = 96%</b>        |
| <b>Symptomatic (N=24)</b>                      |                         |                                   |                      |                                      |                                                    |                                                            |
| Villar, et al. (11)                            | 6                       | 6                                 | 4                    | 6                                    | 66.7% (22.3% to 95.7%)                             | -33.3% (-70% to 12.3%)                                     |
| Ku, et al. (25)                                | 30                      | 24                                | 20                   | 25                                   | 80% (59.3% to 93.2%)                               | -16% (-35.7% to 4%)                                        |
| Teo, et al. (28)                               | 188                     | 123                               | 145                  | 153                                  | 94.8% (90% to 97.7%)                               | 14.4% (6.7% to 22.1%)                                      |
| Yee, et al. (29)                               | 55                      | 51                                | 49                   | 55                                   | 89.1% (77.8% to 95.9%)                             | -3.6% (-15.8% to 8.4%)                                     |
| Senok, et al. (39)                             | 206                     | 14                                | 17                   | 20                                   | 85% (62.1% to 96.8%)                               | 15% (-14.3% to 41.3%)                                      |
| Migueraes, et al. (41)                         | 27                      | 24                                | 22                   | 27                                   | 81.5% (61.9% to 93.7%)                             | -7.4% (-28.1% to 13.9%)                                    |
| Chen, et al. (6)                               | 58                      | 55                                | 52                   | 58                                   | 89.7% (78.8% to 96.1%)                             | -5.2% (-16.4% to 5.7%)                                     |
| Leung, et al. (7)                              | 95                      | 45                                | 51                   | 58                                   | 87.9% (76.7% to 95%)                               | 10.3% (-4.9% to 25.1%)                                     |
| McCormick-Baw, et al. (8)                      | 155                     | 49                                | 48                   | 50                                   | 96% (86.3% to 99.5%)                               | -2% (-11.6% to 7.1%)                                       |
| Landry, et al. (10)                            | 124                     | 33                                | 30                   | 35                                   | 85.7% (69.7% to 95.2%)                             | -8.6% (-24.6% to 7.3%)                                     |
| Akgun Dogan, et al. (12)                       | 200                     | 58                                | 36                   | 63                                   | 57.1% (44% to 69.5%)                               | -34.9% (-49% to -18.4%)                                    |
| Becker, et al. (13)                            | 109                     | 21                                | 15                   | 30                                   | 50% (31.3% to 68.7%)                               | -20% (-47.5% to 11.6%)                                     |
| Byrne, et al. (14)                             | 110                     | 14                                | 12                   | 14                                   | 85.7% (57.2% to 98.2%)                             | -14.3% (-39.9% to 9.6%)                                    |
| Hanson, et al. (16)                            | 354                     | 80                                | 81                   | 86                                   | 94.2% (87% to 98.1%)                               | 1.2% (-7.1% to 9.5%)                                       |
| Jamal, et al. (18)                             | 91                      | 64                                | 52                   | 72                                   | 72.2% (60.4% to 82.1%)                             | -16.7% (-30.2% to -2.4%)                                   |
| Pasomsub, et al. (20)                          | 200                     | 19                                | 18                   | 21                                   | 85.7% (63.7% to 97%)                               | -4.8% (-27.1% to 17.8%)                                    |
| Wyllie, et al. (22)                            | 97                      | 56                                | 60                   | 72                                   | 83.3% (72.7% to 91.1%)                             | 5.6% (-8.9% to 19.7%)                                      |
| Bhattacharya, et al. (23)                      | 74                      | 58                                | 53                   | 58                                   | 91.4% (81% to 97.1%)                               | -8.6% (-18.6% to -0.7%)                                    |
| Goldfarb, et al. (24)                          | 38                      | 28                                | 23                   | 29                                   | 79.3% (60.3% to 92%)                               | -17.2% (-35.4% to 1.1%)                                    |
| Yokota, et al. (30)                            | 42                      | 34                                | 38                   | 38                                   | 100% (90.7% to 100%)                               | 10.5% (-0.6% to 24.1%)                                     |
| Aita, et al. (33)                              | 43                      | 7                                 | 8                    | 8                                    | 100% (63.1% to 100%)                               | 12.5% (-21.5% to 47.1%)                                    |
| Altawalrah, et al. (34)                        | 891                     | 344                               | 305                  | 362                                  | 84.3% (80.1% to 87.9%)                             | -10.8% (-15.4% to -6.2%)                                   |
| Procop, et al. (38)                            | 216                     | 38                                | 39                   | 39                                   | 100% (91% to 100%)                                 | 2.6% (-6.6% to 13.2%)                                      |
| Uwamino, et al. (40)                           | 196                     | 47                                | 43                   | 58                                   | 74.1% (61% to 84.7%)                               | -6.9% (-23.6% to 10.3%)                                    |

| Study                                            | N Paired Samples Tested | N Positive on Nasopharyngeal swab | N Positive on Saliva | N Positive on Any Sample (Reference) | Sensitivity Saliva (95% CI)                  | Difference in Sensitivity (95% CI) [Saliva-Nasopharyngeal] |
|--------------------------------------------------|-------------------------|-----------------------------------|----------------------|--------------------------------------|----------------------------------------------|------------------------------------------------------------|
| <b>Pooled estimate (95% CI); I<sup>2</sup></b>   | 3605                    | 1292                              | 1221                 | 1437                                 | 87.0% (81.6% to 90.9%); I <sup>2</sup> = 82% | -4.9% (-10.2% to 0.4%); I <sup>2</sup> = 75%               |
| <b>Mixed symptomatic and asymptomatic (N=11)</b> |                         |                                   |                      |                                      |                                              |                                                            |
| Azzi, et al. (5)                                 | 113                     | 26                                | 55                   | 59                                   | 93.2% (83.5% to 98.1%)                       | 49.2% (31.3% to 62.9%)                                     |
| Griesemer, et al. (15)                           | 463                     | 103                               | 87                   | 105                                  | 82.9% (74.3% to 89.5%)                       | -15.2% (-23.8% to -7.3%)                                   |
| Iwasaki, et al. (17)                             | 76                      | 9                                 | 9                    | 10                                   | 90% (55.5% to 99.7%)                         | 0% (-32.4% to 32.4%)                                       |
| Miller, et al. (19)                              | 91                      | 34                                | 35                   | 36                                   | 97.2% (85.5% to 99.9%)                       | 2.8% (-9.5% to 15.7%)                                      |
| Ranoa, et al. (21)                               | 99                      | 9                                 | 9                    | 9                                    | 100% (66.4% to 100%)                         | 0% (-29.9% to 29.9%)                                       |
| Nacher, et al. (26)                              | 776                     | 152                               | 86                   | 162                                  | 53.1% (45.1% to 61%)                         | -40.7% (-49.5% to -30.9%)                                  |
| Sahajpal, et al. (27)                            | 240                     | 61                                | 34                   | 68                                   | 50% (37.6% to 62.4%)                         | -39.7% (-53.9% to -22.5%)                                  |
| Barat, et al. (32)                               | 451                     | 29                                | 26                   | 30                                   | 86.7% (69.3% to 96.2%)                       | -10% (-26.8% to 6.1%)                                      |
| Binder, et al. (35)                              | 19                      | 11                                | 11                   | 12                                   | 91.7% (61.5% to 99.8%)                       | 0% (-28.5% to 28.5%)                                       |
| Caulley, et al. (36)                             | 272                     | 8                                 | 11                   | 13                                   | 84.6% (54.6% to 98.1%)                       | 23.1% (-16% to 54.6%)                                      |
| Kojima, et al. (37)                              | 45                      | 23                                | 26                   | 29                                   | 89.7% (72.6% to 97.8%)                       | 10.3% (-10.5% to 30.4%)                                    |
| <b>Pooled estimate (95% CI); I<sup>2</sup></b>   | 2645                    | 465                               | 389                  | 533                                  | 86.4% (74.9% to 93.2%); I <sup>2</sup> = 87% | -3.5% (-21.2% to 14.3%); I <sup>2</sup> = 90%              |

**Abbreviations:** N: Number, CI: Confidence Interval

Supplement Table 13 | Difference in Sensitivity to SARS-CoV-2 Between Nasopharyngeal Swabs and Saliva, Stratified by Setting

| Study                                          | N Paired Samples Tested | N Positive on Nasopharyngeal swab | N Positive on Saliva | N Positive on Any Sample (Reference) | Sensitivity Saliva (95% CI)                        | Difference in Sensitivity (95% CI) [Saliva-Nasopharyngeal swab] |
|------------------------------------------------|-------------------------|-----------------------------------|----------------------|--------------------------------------|----------------------------------------------------|-----------------------------------------------------------------|
| <b>Outpatients (N=20)</b>                      |                         |                                   |                      |                                      |                                                    |                                                                 |
| Landry, et al. (10)                            | 124                     | 33                                | 30                   | 35                                   | 85.7% (69.7% to 95.2%)                             | -8.6% (-24.6% to 7.3%)                                          |
| Villar, et al. (11)                            | 13                      | 9                                 | 7                    | 9                                    | 77.8% (40% to 97.2%)                               | -22.2% (-54.7% to 11.7%)                                        |
| Becker, et al. (13)                            | 109                     | 21                                | 15                   | 30                                   | 50% (31.3% to 68.7%)                               | -20% (-47.5% to 11.6%)                                          |
| Griesemer, et al. (15)                         | 463                     | 103                               | 87                   | 105                                  | 82.9% (74.3% to 89.5%)                             | -15.2% (-23.8% to -7.3%)                                        |
| Hanson, et al. (16)                            | 354                     | 80                                | 81                   | 86                                   | 94.2% (87% to 98.1%)                               | 1.2% (-7.1% to 9.5%)                                            |
| Miller, et al. (19)                            | 91                      | 34                                | 35                   | 36                                   | 97.2% (85.5% to 99.9%)                             | 2.8% (-9.5% to 15.7%)                                           |
| Pasomsub, et al. (20)                          | 200                     | 19                                | 18                   | 21                                   | 85.7% (63.7% to 97%)                               | -4.8% (-27.1% to 17.8%)                                         |
| Ranoa, et al. (21)                             | 99                      | 9                                 | 9                    | 9                                    | 100% (66.4% to 100%)                               | 0% (-29.9% to 29.9%)                                            |
| Goldfarb, et al. (24)                          | 38                      | 28                                | 23                   | 29                                   | 79.3% (60.3% to 92%)                               | -17.2% (-35.4% to 1.1%)                                         |
| Nacher, et al. (26)                            | 776                     | 152                               | 86                   | 162                                  | 53.1% (45.1% to 61%)                               | -40.7% (-49.5% to -30.9%)                                       |
| Teo, et al. (28)                               | 337                     | 150                               | 209                  | 220                                  | 95% (91.2% to 97.5%)                               | 26.8% (19.4% to 33.9%)                                          |
| Yee, et al. (29)                               | 70                      | 62                                | 57                   | 70                                   | 81.4% (70.3% to 89.7%)                             | -7.1% (-20% to 5.9%)                                            |
| Barat, et al. (32)                             | 451                     | 29                                | 26                   | 30                                   | 86.7% (69.3% to 96.2%)                             | -10% (-26.8% to 6.1%)                                           |
| Caulley, et al. (36)                           | 272                     | 8                                 | 11                   | 13                                   | 84.6% (54.6% to 98.1%)                             | 23.1% (-16% to 54.6%)                                           |
| Kojima, et al. (37)                            | 45                      | 23                                | 26                   | 29                                   | 89.7% (72.6% to 97.8%)                             | 10.3% (-10.5% to 30.4%)                                         |
| Procop, et al. (38)                            | 216                     | 38                                | 39                   | 39                                   | 100% (91% to 100%)                                 | 2.6% (-6.6% to 13.2%)                                           |
| Senok, et al. (39)                             | 401                     | 26                                | 28                   | 35                                   | 80% (63.1% to 91.6%)                               | 5.7% (-16.5% to 27.2%)                                          |
| Yokota, et al. (31)                            | 161                     | 41                                | 44                   | 47                                   | 93.6% (82.5% to 98.7%)                             | 6.4% (-6.9% to 19.9%)                                           |
| Uwamino, et al. (40)                           | 114                     | 2                                 | 2                    | 2                                    | 100% (15.8% to 100%)                               | 0% (-65.8% to 65.8%)                                            |
| Migueres, et al. (41)                          | 95                      | 32                                | 29                   | 32                                   | 90.6% (75% to 98%)                                 | -9.4% (-24.2% to 3%)                                            |
| <b>Pooled estimate (95% CI); I<sup>2</sup></b> | <b>4429</b>             | <b>899</b>                        | <b>862</b>           | <b>1039</b>                          | <b>87.9% (81.5% to 92.2%); I<sup>2</sup> = 82%</b> | <b>-4.3% (-11.8% to 3.2%); I<sup>2</sup> = 79%</b>              |
| <b>Inpatients (N=14)</b>                       |                         |                                   |                      |                                      |                                                    |                                                                 |
| Chen, et al. (6)                               | 58                      | 55                                | 52                   | 58                                   | 89.7% (78.8% to 96.1%)                             | -5.2% (-16.4% to 5.7%)                                          |
| Leung, et al. (7)                              | 95                      | 45                                | 51                   | 58                                   | 87.9% (76.7% to 95%)                               | 10.3% (-4.9% to 25.1%)                                          |
| McCormick-Baw, et al. (8)                      | 155                     | 49                                | 48                   | 50                                   | 96% (86.3% to 99.5%)                               | -2% (-11.6% to 7.1%)                                            |
| Akgun Dogan, et al. (12)                       | 200                     | 58                                | 36                   | 63                                   | 57.1% (44% to 69.5%)                               | -34.9% (-49% to -18.4%)                                         |
| Jamal, et al. (18)                             | 91                      | 64                                | 52                   | 72                                   | 72.2% (60.4% to 82.1%)                             | -16.7% (-30.2% to -2.4%)                                        |
| Wyllie, et al. (22)                            | 97                      | 56                                | 60                   | 72                                   | 83.3% (72.7% to 91.1%)                             | 5.6% (-8.9% to 19.7%)                                           |
| Bhattacharya, et al. (23)                      | 74                      | 58                                | 53                   | 58                                   | 91.4% (81% to 97.1%)                               | -8.6% (-18.6% to -0.7%)                                         |
| Ku, et al. (25)                                | 42                      | 30                                | 21                   | 31                                   | 67.7% (48.6% to 83.3%)                             | -29% (-47.2% to -9%)                                            |
| Yokota, et al. (30)                            | 42                      | 34                                | 38                   | 38                                   | 100% (90.7% to 100%)                               | 10.5% (-0.6% to 24.1%)                                          |
| Aita, et al. (33)                              | 43                      | 7                                 | 8                    | 8                                    | 100% (63.1% to 100%)                               | 12.5% (-21.5% to 47.1%)                                         |
| Altawalah, et al. (34)                         | 891                     | 344                               | 305                  | 362                                  | 84.3% (80.1% to 87.9%)                             | -10.8% (-15.4% to -6.2%)                                        |
| Binder, et al. (35)                            | 19                      | 11                                | 11                   | 12                                   | 91.7% (61.5% to 99.8%)                             | 0% (-28.5% to 28.5%)                                            |
| Uwamino, et al. (40)                           | 82                      | 45                                | 41                   | 56                                   | 73.2% (59.7% to 84.2%)                             | -7.1% (-24.4% to 10.7%)                                         |

| Study                                          | N Paired Samples Tested | N Positive on Nasopharyngeal swab | N Positive on Saliva | N Positive on Any Sample (Reference) | Sensitivity Saliva (95% CI)                  | Difference in Sensitivity (95% CI) [Saliva-Nasopharyngeal swab] |
|------------------------------------------------|-------------------------|-----------------------------------|----------------------|--------------------------------------|----------------------------------------------|-----------------------------------------------------------------|
| Migueres, et al. (41)                          | 28                      | 9                                 | 8                    | 12                                   | 66.7% (34.9% to 90.1%)                       | -8.3% (-45.5% to 32%)                                           |
| <b>Pooled estimate (95% CI); I<sup>2</sup></b> | 1917                    | 865                               | 784                  | 950                                  | 85.3% (77.3% to 90.9%); I <sup>2</sup> = 85% | -6.6% (-14.7% to 1.4%); I <sup>2</sup> = 79%                    |
| <b>Both Inpatients and Outpatients (N=6)</b>   |                         |                                   |                      |                                      |                                              |                                                                 |
| Azzi, et al. (5)                               | 113                     | 26                                | 55                   | 59                                   | 93.2% (83.5% to 98.1%)                       | 49.2% (31.3% to 62.9%)                                          |
| Rao, et al. (9)                                | 217                     | 84                                | 149                  | 160                                  | 93.1% (88% to 96.5%)                         | 40.6% (30.5% to 49.6%)                                          |
| Byrne, et al. (14)                             | 110                     | 14                                | 12                   | 14                                   | 85.7% (57.2% to 98.2%)                       | -14.3% (-39.9% to 9.6%)                                         |
| Iwasaki, et al. (17)                           | 76                      | 9                                 | 9                    | 10                                   | 90% (55.5% to 99.7%)                         | 0% (-32.4% to 32.4%)                                            |
| Sahajpal, et al. (27)                          | 240                     | 61                                | 34                   | 68                                   | 50% (37.6% to 62.4%)                         | -39.7% (-53.9% to -22.5%)                                       |
| Yee, et al. (29)                               | 27                      | 25                                | 22                   | 27                                   | 81.5% (61.9% to 93.7%)                       | -11.1% (-30.7% to 9%)                                           |
| <b>Pooled estimate (95% CI); I<sup>2</sup></b> | 783                     | 219                               | 281                  | 338                                  | 85.6% (71% to 93.5%); I <sup>2</sup> = 83%   | 4.6% (-32.1% to 41.2%); I <sup>2</sup> = 93%                    |

**Abbreviations:** N: Number, CI: Confidence Interval



Supplement Table 14 | Difference in Sensitivity to SARS-CoV-2 Between Nasopharyngeal Swabs and Saliva, Stratified by Age Group

| Study                                          | N Paired Samples Tested | N Positive on Nasopharyngeal Swab | N Positive on Saliva | N Positive on Any Sample (Reference) | Sensitivity Saliva (95% CI)                        | Difference in Sensitivity (95% CI) [Saliva-Nasopharyngeal swab] |
|------------------------------------------------|-------------------------|-----------------------------------|----------------------|--------------------------------------|----------------------------------------------------|-----------------------------------------------------------------|
| <b>≥ 18 years (N=24)</b>                       |                         |                                   |                      |                                      |                                                    |                                                                 |
| Azzi, et al. (5)                               | 113                     | 26                                | 55                   | 59                                   | 93.2% (83.5% to 98.1%)                             | 49.2% (31.3% to 62.9%)                                          |
| Chen, et al. (6)                               | 58                      | 55                                | 52                   | 58                                   | 89.7% (78.8% to 96.1%)                             | -5.2% (-16.4% to 5.7%)                                          |
| Leung, et al. (7)                              | 95                      | 45                                | 51                   | 58                                   | 87.9% (76.7% to 95%)                               | 10.3% (-4.9% to 25.1%)                                          |
| McCormick-Baw, et al. (8)                      | 155                     | 49                                | 48                   | 50                                   | 96% (86.3% to 99.5%)                               | -2% (-11.6% to 7.1%)                                            |
| Rao, et al. (9)                                | 217                     | 84                                | 149                  | 160                                  | 93.1% (88% to 96.5%)                               | 40.6% (30.5% to 49.6%)                                          |
| Akgun Dogan, et al. (12)                       | 200                     | 58                                | 36                   | 63                                   | 57.1% (44% to 69.5%)                               | -34.9% (-49% to -18.4%)                                         |
| Byrne, et al. (14)                             | 110                     | 14                                | 12                   | 14                                   | 85.7% (57.2% to 98.2%)                             | -14.3% (-39.9% to 9.6%)                                         |
| Hanson, et al. (16)                            | 354                     | 80                                | 81                   | 86                                   | 94.2% (87% to 98.1%)                               | 1.2% (-7.1% to 9.5%)                                            |
| Iwasaki, et al. (17)                           | 76                      | 9                                 | 9                    | 10                                   | 90% (55.5% to 99.7%)                               | 0% (-32.4% to 32.4%)                                            |
| Jamal, et al. (18)                             | 91                      | 64                                | 52                   | 72                                   | 72.2% (60.4% to 82.1%)                             | -16.7% (-30.2% to -2.4%)                                        |
| Miller, et al. (19)                            | 91                      | 34                                | 35                   | 36                                   | 97.2% (85.5% to 99.9%)                             | 2.8% (-9.5% to 15.7%)                                           |
| Pasomsub, et al. (20)                          | 200                     | 19                                | 18                   | 21                                   | 85.7% (63.7% to 97%)                               | -4.8% (-27.1% to 17.8%)                                         |
| Ku, et al. (25)                                | 42                      | 30                                | 21                   | 31                                   | 67.7% (48.6% to 83.3%)                             | -29% (-47.2% to -9%)                                            |
| Teo, et al. (28)                               | 337                     | 150                               | 209                  | 220                                  | 95% (91.2% to 97.5%)                               | 26.8% (19.4% to 33.9%)                                          |
| Yee, et al. (29)                               | 54                      | 49                                | 45                   | 54                                   | 83.3% (70.7% to 92.1%)                             | -7.4% (-21.2% to 6.6%)                                          |
| Yokota, et al. (30)                            | 42                      | 34                                | 38                   | 38                                   | 100% (90.7% to 100%)                               | 10.5% (-0.6% to 24.1%)                                          |
| Yokota, et al. (31)                            | 161                     | 41                                | 44                   | 47                                   | 93.6% (82.5% to 98.7%)                             | 6.4% (-6.9% to 19.9%)                                           |
| Barat, et al. (32)                             | 451                     | 29                                | 26                   | 30                                   | 86.7% (69.3% to 96.2%)                             | -10% (-26.8% to 6.1%)                                           |
| Aita, et al. (33)                              | 43                      | 7                                 | 8                    | 8                                    | 94.4% (63.1% to 100%)                              | 12.5% (-21.5% to 47.1%)                                         |
| Binder, et al. (35)                            | 19                      | 11                                | 11                   | 12                                   | 91.7% (61.5% to 99.8%)                             | 0% (-28.5% to 28.5%)                                            |
| Caulley, et al. (36)                           | 272                     | 8                                 | 11                   | 13                                   | 84.6% (54.6% to 98.1%)                             | 23.1% (-16% to 54.6%)                                           |
| Kojima, et al. (37)                            | 45                      | 23                                | 26                   | 29                                   | 89.7% (72.6% to 97.8%)                             | 10.3% (-10.5% to 30.4%)                                         |
| Procop, et al. (38)                            | 216                     | 38                                | 39                   | 39                                   | 100% (91% to 100%)                                 | 2.6% (-6.6% to 13.2%)                                           |
| Senok, et al. (39)                             | 401                     | 26                                | 28                   | 35                                   | 80% (63.1% to 91.6%)                               | 5.7% (-16.5% to 27.2%)                                          |
| <b>Pooled estimate (95% CI); I<sup>2</sup></b> | <b>3843</b>             | <b>983</b>                        | <b>1104</b>          | <b>1243</b>                          | <b>90.4% (86.1% to 93.5%); I<sup>2</sup> = 76%</b> | <b>3.1% (5.1% to 11.3%); I<sup>2</sup> = 86%</b>                |
| <b>&lt;18 years (N=1)</b>                      |                         |                                   |                      |                                      |                                                    |                                                                 |
| Yee, et al. (29)                               | 43                      | 38                                | 34                   | 43                                   | 79.1% (64% to 90%)                                 | -9.3% (-26.1% to 8.1%)                                          |
| <b>Mixed/Unclear age (N=13)*</b>               |                         |                                   |                      |                                      |                                                    |                                                                 |
| Landry, et al. (10)                            | 124                     | 33                                | 30                   | 35                                   | 85.7% (69.7% to 95.2%)                             | -8.6% (-24.6% to 7.3%)                                          |
| Villar, et al. (11)                            | 13                      | 9                                 | 7                    | 9                                    | 77.8% (40% to 97.2%)                               | -22.2% (-54.7% to 11.7%)                                        |
| Becker, et al. (13)                            | 109                     | 21                                | 15                   | 30                                   | 50% (31.3% to 68.7%)                               | -20% (-47.5% to 11.6%)                                          |
| Griesemer, et al. (15)                         | 463                     | 103                               | 87                   | 105                                  | 82.9% (74.3% to 89.5%)                             | -15.2% (-23.8% to -7.3%)                                        |
| Ranoa, et al. (21)                             | 99                      | 9                                 | 9                    | 9                                    | 100% (66.4% to 100%)                               | 0% (-29.9% to 29.9%)                                            |
| Wyllie, et al. (22)                            | 97                      | 56                                | 60                   | 72                                   | 83.3% (72.7% to 91.1%)                             | 5.6% (-8.9% to 19.7%)                                           |

| Study                                          | N Paired Samples Tested | N Positive on Nasopharyngeal Swab | N Positive on Saliva | N Positive on Any Sample (Reference) | Sensitivity Saliva (95% CI)                | Difference in Sensitivity (95% CI) [Saliva-Nasopharyngeal swab] |
|------------------------------------------------|-------------------------|-----------------------------------|----------------------|--------------------------------------|--------------------------------------------|-----------------------------------------------------------------|
| Bhattacharya, et al. (23)                      | 74                      | 58                                | 53                   | 58                                   | 91.4% (81% to 97.1%)                       | -8.6% (-18.6% to -0.7%)                                         |
| Goldfarb, et al. (24)                          | 38                      | 28                                | 23                   | 29                                   | 79.3% (60.3% to 92%)                       | -17.2% (-35.4% to 1.1%)                                         |
| Nacher, et al. (26)                            | 776                     | 152                               | 86                   | 162                                  | 53.1% (45.1% to 61%)                       | -40.7% (-49.5% to -30.9%)                                       |
| Sahajpal, et al. (27)                          | 240                     | 61                                | 34                   | 68                                   | 50% (37.6% to 62.4%)                       | -39.7% (-53.9% to -22.5%)                                       |
| Altawalah, et al. (34)                         | 891                     | 344                               | 305                  | 362                                  | 84.3% (80.1% to 87.9%)                     | -10.8% (-15.4% to -6.2%)                                        |
| Uwamino, et al. (40)                           | 196                     | 47                                | 43                   | 58                                   | 74.1% (61% to 84.7%)                       | -6.9% (-23.6% to 10.3%)                                         |
| Migueres, et al. (41)                          | 123                     | 41                                | 37                   | 44                                   | 84.1% (69.9% to 93.4%)                     | -9.1% (-23.8% to 5.6%)                                          |
| <b>Pooled estimate (95% CI); I<sup>2</sup></b> | 3243                    | 962                               | 789                  | 1041                                 | 78% (69.1% to 84.9%); I <sup>2</sup> = 86% | -15.3% (-23.8% to -6.9%); I <sup>2</sup> = 79%                  |

**Abbreviations:** N: Number, CI: Confidence Interval.

**Notes:** \* Included studies that included pediatric (<18 years) and adult (≥18 years) and did not report the outcome stratified by age group. It also includes studies that did not report the age group evaluated.

Supplement Table 15 | Difference in Sensitivity to SARS-CoV-2 Between Nasopharyngeal Swabs and Saliva, Stratified by **Saliva Collection Method**

| Study*                                                                | N Paired Samples Tested | N Positive on Nasopharyngeal Swab | N Positive on Saliva | N Positive on Any Sample (Reference) | Sensitivity Saliva (95% CI)                  | Difference in Sensitivity (95% CI) [Saliva-Nasopharyngeal swab] |
|-----------------------------------------------------------------------|-------------------------|-----------------------------------|----------------------|--------------------------------------|----------------------------------------------|-----------------------------------------------------------------|
| <b>Early morning posterior oropharyngeal spitting technique (N=3)</b> |                         |                                   |                      |                                      |                                              |                                                                 |
| Chen, et al. (6)                                                      | 58                      | 55                                | 52                   | 58                                   | 89.7% (78.8% to 96.1%)                       | -5.2% (-16.4% to 5.7%)                                          |
| Leung, et al. (7)                                                     | 95                      | 45                                | 51                   | 58                                   | 87.9% (76.7% to 95%)                         | 10.3% (-4.9% to 25.1%)                                          |
| Rao, et al. (9)                                                       | 217                     | 84                                | 149                  | 160                                  | 93.1% (88% to 96.5%)                         | 40.6% (30.5% to 49.6%)                                          |
| <b>Pooled estimate (95% CI); I<sup>2</sup></b>                        | 370                     | 184                               | 252                  | 276                                  | 91.3% (87.4% to 94.1%); I <sup>2</sup> = 0%  | 15.4% (-42.9% to 73.8%); I <sup>2</sup> = 93%                   |
| <b>Drooling technique (N=5)</b>                                       |                         |                                   |                      |                                      |                                              |                                                                 |
| Azzi, et al. (5)                                                      | 113                     | 26                                | 55                   | 59                                   | 93.2% (83.5% to 98.1%)                       | 49.2% (31.3% to 62.9%)                                          |
| Akgun Dogan, et al. (12)                                              | 200                     | 58                                | 36                   | 63                                   | 57.1% (44% to 69.5%)                         | -34.9% (-49% to -18.4%)                                         |
| Ranoa, et al. (21)                                                    | 99                      | 9                                 | 9                    | 9                                    | 100% (66.4% to 100%)                         | 0% (-29.9% to 29.9%)                                            |
| Barat, et al. (32)                                                    | 451                     | 29                                | 26                   | 30                                   | 86.7% (69.3% to 96.2%)                       | -10% (-26.8% to 6.1%)                                           |
| Binder, et al. (35)                                                   | 19                      | 11                                | 11                   | 12                                   | 91.7% (61.5% to 99.8%)                       | 0% (-28.5% to 28.5%)                                            |
| <b>Pooled estimate (95% CI); I<sup>2</sup></b>                        | 882                     | 133                               | 137                  | 173                                  | 87.9% (69.9% to 95.8%); I <sup>2</sup> = 77% | 0.6% (-38.4% to 39.6%); I <sup>2</sup> = 90%                    |
| <b>Posterior pharyngeal spitting technique (N=5)</b>                  |                         |                                   |                      |                                      |                                              |                                                                 |
| Ku, et al. (25)                                                       | 42                      | 30                                | 21                   | 31                                   | 67.7% (48.6% to 83.3%)                       | -29% (-47.2% to -9%)                                            |
| Teo, et al. (28)                                                      | 337                     | 150                               | 209                  | 220                                  | 95% (91.2% to 97.5%)                         | 26.8% (19.4% to 33.9%)                                          |
| Altawalah, et al. (34)                                                | 891                     | 344                               | 305                  | 362                                  | 84.3% (80.1% to 87.9%)                       | -10.8% (-15.4% to -6.2%)                                        |
| Procop, et al. (38)                                                   | 216                     | 38                                | 39                   | 39                                   | 100% (91% to 100%)                           | 2.6% (-6.6% to 13.2%)                                           |
| <b>Pooled estimate (95% CI); I<sup>2</sup></b>                        | 1486                    | 562                               | 574                  | 652                                  | 91.5% (72.7% to 97.7%); I <sup>2</sup> = 94% | -1.8% (-38.8% to 35.1%); I <sup>2</sup> = 97%                   |
| <b>General spitting technique (N=20)</b>                              |                         |                                   |                      |                                      |                                              |                                                                 |
| McCormick-Baw, et al. (8)                                             | 155                     | 49                                | 48                   | 50                                   | 96% (86.3% to 99.5%)                         | -2% (-11.6% to 7.1%)                                            |
| Landry, et al. (10)                                                   | 124                     | 33                                | 30                   | 35                                   | 85.7% (69.7% to 95.2%)                       | -8.6% (-24.6% to 7.3%)                                          |
| Becker, et al. (13)                                                   | 109                     | 21                                | 15                   | 30                                   | 50% (31.3% to 68.7%)                         | -20% (-47.5% to 11.6%)                                          |
| Byrne, et al. (14)                                                    | 110                     | 14                                | 12                   | 14                                   | 85.7% (57.2% to 98.2%)                       | -14.3% (-39.9% to 9.6%)                                         |
| Griesemer, et al. (15)                                                | 463                     | 103                               | 87                   | 105                                  | 82.9% (74.3% to 89.5%)                       | -15.2% (-23.8% to -7.3%)                                        |
| Hanson, et al. (16)                                                   | 354                     | 80                                | 81                   | 86                                   | 94.2% (87% to 98.1%)                         | 1.2% (-7.1% to 9.5%)                                            |
| Iwasaki, et al. (17)                                                  | 76                      | 9                                 | 9                    | 10                                   | 90% (55.5% to 99.7%)                         | 0% (-32.4% to 32.4%)                                            |
| Jamal, et al. (18)                                                    | 91                      | 64                                | 52                   | 72                                   | 72.2% (60.4% to 82.1%)                       | -16.7% (-30.2% to -2.4%)                                        |
| Miller, et al. (19)                                                   | 91                      | 34                                | 35                   | 36                                   | 97.2% (85.5% to 99.9%)                       | 2.8% (-9.5% to 15.7%)                                           |
| Pasomsub, et al. (20)                                                 | 200                     | 19                                | 18                   | 21                                   | 85.7% (63.7% to 97%)                         | -4.8% (-27.1% to 17.8%)                                         |
| Wyllie, et al. (22)                                                   | 97                      | 56                                | 60                   | 72                                   | 83.3% (72.7% to 91.1%)                       | 5.6% (-8.9% to 19.7%)                                           |
| Goldfarb, et al. (24)                                                 | 38                      | 28                                | 23                   | 29                                   | 79.3% (60.3% to 92%)                         | -17.2% (-35.4% to 1.1%)                                         |
| Nacher, et al. (26)                                                   | 776                     | 152                               | 86                   | 162                                  | 53.1% (45.1% to 61%)                         | -40.7% (-49.5% to -30.9%)                                       |
| Sahajpal, et al. (27)                                                 | 240                     | 61                                | 34                   | 68                                   | 50% (37.6% to 62.4%)                         | -39.7% (-53.9% to -22.5%)                                       |
| Yee, et al. (29)                                                      | 300                     | 87                                | 79                   | 97                                   | 81.4% (72.3% to 88.6%)                       | -8.2% (-18.9% to 2.5%)                                          |
| Yokota, et al. (30)                                                   | 42                      | 34                                | 38                   | 38                                   | 100% (90.7% to 100%)                         | 10.5% (-0.6% to 24.1%)                                          |
| Yokota, et al. (31)                                                   | 161                     | 41                                | 44                   | 47                                   | 93.6% (82.5% to 98.7%)                       | 6.4% (-6.9% to 19.9%)                                           |

| Study*                                         | N Paired Samples Tested | N Positive on Nasopharyngeal Swab | N Positive on Saliva | N Positive on Any Sample (Reference) | Sensitivity Saliva (95% CI)                 | Difference in Sensitivity (95% CI) [Saliva-Nasopharyngeal swab] |
|------------------------------------------------|-------------------------|-----------------------------------|----------------------|--------------------------------------|---------------------------------------------|-----------------------------------------------------------------|
| Caulley, et al. (36)                           | 272                     | 8                                 | 11                   | 13                                   | 84.6% (54.6% to 98.1%)                      | 23.1% (-16% to 54.6%)                                           |
| Senok, et al. (39)                             | 401                     | 26                                | 28                   | 35                                   | 80% (63.1% to 91.6%)                        | 5.7% (-16.5% to 27.2%)                                          |
| Miqueres, et al. (41)                          | 123                     | 41                                | 37                   | 44                                   | 84.1% (69.9% to 93.4%)                      | -9.1% (-23.8% to 5.6%)                                          |
| <b>Pooled estimate (95% CI); I<sup>2</sup></b> | 4223                    | 960                               | 827                  | 1064                                 | 84.7% (77.4% to 90%); I <sup>2</sup> = 87%  | -8.1% (-15.3% to -0.9%); I <sup>2</sup> = 80%                   |
| <b>Saliva collection device (N=3)</b>          |                         |                                   |                      |                                      |                                             |                                                                 |
| Villar, et al. (11)                            | 13                      | 9                                 | 7                    | 9                                    | 77.8% (40% to 97.2%)                        | -22.2% (-54.7% to 11.7%)                                        |
| Aita, et al. (33)                              | 43                      | 7                                 | 8                    | 8                                    | 100% (63.1% to 100%)                        | 12.5% (-21.5% to 47.1%)                                         |
| Kojima, et al. (37)                            | 45                      | 23                                | 26                   | 29                                   | 89.7% (72.6% to 97.8%)                      | 10.3% (-10.5% to 30.4%)                                         |
| <b>Pooled estimate (95% CI); I<sup>2</sup></b> | 101                     | 39                                | 41                   | 46                                   | 89.1% (76.4% to 95.4%); I <sup>2</sup> = 0% | 1.6% (-44.5% to 47.6%); I <sup>2</sup> = 47%                    |

**Abbreviations:** N: Number, CI: Confidence Interval.

**Notes:** \*Two studies did not report the saliva collection method.

Supplement Table 16 | Difference in Sensitivity to SARS-CoV-2 Between Nasopharyngeal Swabs and Saliva, Stratified by **Usage of Transport Media with Saliva**

| <b>Study</b>                                   | <b>N Paired Samples Tested</b> | <b>N Positive on Nasopharyngeal Swab</b> | <b>N Positive on Saliva</b> | <b>N Positive on Any Sample (Reference)</b> | <b>Sensitivity Saliva (95% CI)</b>               | <b>Difference in Sensitivity (95% CI) [Saliva-Nasopharyngeal swab]</b> |
|------------------------------------------------|--------------------------------|------------------------------------------|-----------------------------|---------------------------------------------|--------------------------------------------------|------------------------------------------------------------------------|
| <b>Used Transport Media (N=18)</b>             |                                |                                          |                             |                                             |                                                  |                                                                        |
| Chen, et al. (6)                               | 58                             | 55                                       | 52                          | 58                                          | 89.7% (78.8% to 96.1%)                           | -5.2% (-16.4% to 5.7%)                                                 |
| Leung, et al. (7)                              | 95                             | 45                                       | 51                          | 58                                          | 87.9% (76.7% to 95%)                             | 10.3% (-4.9% to 25.1%)                                                 |
| Akgun Dogan, et al. (12)                       | 200                            | 58                                       | 36                          | 63                                          | 57.1% (44% to 69.5%)                             | -34.9% (-49% to -18.4%)                                                |
| Becker, et al. (13)                            | 109                            | 21                                       | 15                          | 30                                          | 50% (31.3% to 68.7%)                             | -20% (-47.5% to 11.6%)                                                 |
| Hanson, et al. (16)                            | 354                            | 80                                       | 81                          | 86                                          | 94.2% (87% to 98.1%)                             | 1.2% (-7.1% to 9.5%)                                                   |
| Iwasaki, et al. (17)                           | 76                             | 9                                        | 9                           | 10                                          | 90% (55.5% to 99.7%)                             | 0% (-32.4% to 32.4%)                                                   |
| Jamal, et al. (18)                             | 91                             | 64                                       | 52                          | 72                                          | 72.2% (60.4% to 82.1%)                           | -16.7% (-30.2% to -2.4%)                                               |
| Miller, et al. (19)                            | 91                             | 34                                       | 35                          | 36                                          | 97.2% (85.5% to 99.9%)                           | 2.8% (-9.5% to 15.7%)                                                  |
| Pasomsub, et al. (20)                          | 200                            | 19                                       | 18                          | 21                                          | 85.7% (63.7% to 97%)                             | -4.8% (-27.1% to 17.8%)                                                |
| Ranoa, et al. (21)                             | 99                             | 9                                        | 9                           | 9                                           | 100% (66.4% to 100%)                             | 0% (-29.9% to 29.9%)                                                   |
| Sahajpal, et al. (27)                          | 240                            | 61                                       | 34                          | 68                                          | 50% (37.6% to 62.4%)                             | -39.7% (-53.9% to -22.5%)                                              |
| Teo, et al. (28)                               | 337                            | 150                                      | 209                         | 220                                         | 95% (91.2% to 97.5%)                             | 26.8% (19.4% to 33.9%)                                                 |
| Yokota, et al. (30)                            | 42                             | 34                                       | 38                          | 38                                          | 100% (90.7% to 100%)                             | 10.5% (-0.6% to 24.1%)                                                 |
| Yokota, et al. (31)                            | 161                            | 41                                       | 44                          | 47                                          | 93.6% (82.5% to 98.7%)                           | 6.4% (-6.9% to 19.9%)                                                  |
| Altawalah, et al. (34)                         | 891                            | 344                                      | 305                         | 362                                         | 84.3% (80.1% to 87.9%)                           | -10.8% (-15.4% to -6.2%)                                               |
| Binder, et al. (35)                            | 19                             | 11                                       | 11                          | 12                                          | 91.7% (61.5% to 99.8%)                           | 0% (-28.5% to 28.5%)                                                   |
| Caulley, et al. (36)                           | 272                            | 8                                        | 11                          | 13                                          | 84.6% (54.6% to 98.1%)                           | 23.1% (-16% to 54.6%)                                                  |
| Kojima, et al. (37)                            | 45                             | 23                                       | 26                          | 29                                          | 89.7% (72.6% to 97.8%)                           | 10.3% (-10.5% to 30.4%)                                                |
| <b>Pooled estimate (95% CI); I<sup>2</sup></b> | <b>3380</b>                    | <b>1066</b>                              | <b>1036</b>                 | <b>1232</b>                                 | <b>88.0% (80.2% to 93%); I<sup>2</sup> = 89%</b> | <b>-2.8% (-11.6% to 6.1%); I<sup>2</sup> = 86%</b>                     |
| <b>Did Not Use Transport Media (N=18)</b>      |                                |                                          |                             |                                             |                                                  |                                                                        |
| Azzi, et al. (5)                               | 113                            | 26                                       | 55                          | 59                                          | 93.2% (83.5% to 98.1%)                           | 49.2% (31.3% to 62.9%)                                                 |
| McCormick-Baw, et al. (8)                      | 155                            | 49                                       | 48                          | 50                                          | 96% (86.3% to 99.5%)                             | -2% (-11.6% to 7.1%)                                                   |
| Rao, et al. (9)                                | 217                            | 84                                       | 149                         | 160                                         | 93.1% (88% to 96.5%)                             | 40.6% (30.5% to 49.6%)                                                 |
| Landry, et al. (10)                            | 124                            | 33                                       | 30                          | 35                                          | 85.7% (69.7% to 95.2%)                           | -8.6% (-24.6% to 7.3%)                                                 |
| Villar, et al. (11)                            | 13                             | 9                                        | 7                           | 9                                           | 77.8% (40% to 97.2%)                             | -22.2% (-54.7% to 11.7%)                                               |
| Byrne, et al. (14)                             | 110                            | 14                                       | 12                          | 14                                          | 85.7% (57.2% to 98.2%)                           | -14.3% (-39.9% to 9.6%)                                                |
| Griesemer, et al. (15)                         | 463                            | 103                                      | 87                          | 105                                         | 82.9% (74.3% to 89.5%)                           | -15.2% (-23.8% to -7.3%)                                               |
| Wyllie, et al. (22)                            | 97                             | 56                                       | 60                          | 72                                          | 83.3% (72.7% to 91.1%)                           | 5.6% (-8.9% to 19.7%)                                                  |
| Goldfarb, et al. (24)                          | 38                             | 28                                       | 23                          | 29                                          | 79.3% (60.3% to 92%)                             | -17.2% (-35.4% to 1.1%)                                                |
| Ku, et al. (25)                                | 42                             | 30                                       | 21                          | 31                                          | 67.7% (48.6% to 83.3%)                           | -29% (-47.2% to -9%)                                                   |
| Nacher, et al. (26)                            | 776                            | 152                                      | 86                          | 162                                         | 53.1% (45.1% to 61%)                             | -40.7% (-49.5% to -30.9%)                                              |
| Yee, et al. (29)                               | 300                            | 87                                       | 79                          | 97                                          | 81.4% (72.3% to 88.6%)                           | -8.2% (-18.9% to 2.5%)                                                 |
| Barat, et al. (32)                             | 451                            | 29                                       | 26                          | 30                                          | 86.7% (69.3% to 96.2%)                           | -10% (-26.8% to 6.1%)                                                  |
| Aita, et al. (33)                              | 43                             | 7                                        | 8                           | 8                                           | 100% (63.1% to 100%)                             | 12.5% (-21.5% to 47.1%)                                                |
| Procop, et al. (38)                            | 216                            | 38                                       | 39                          | 39                                          | 100% (91% to 100%)                               | 2.6% (-6.6% to 13.2%)                                                  |

| Study                                          | N Paired Samples Tested | N Positive on Nasopharyngeal Swab | N Positive on Saliva | N Positive on Any Sample (Reference) | Sensitivity Saliva (95% CI)                  | Difference in Sensitivity (95% CI) [Saliva-Nasopharyngeal swab] |
|------------------------------------------------|-------------------------|-----------------------------------|----------------------|--------------------------------------|----------------------------------------------|-----------------------------------------------------------------|
| Senok, et al. (39)                             | 401                     | 26                                | 28                   | 35                                   | 80% (63.1% to 91.6%)                         | 5.7% (-16.5% to 27.2%)                                          |
| Uwamino, et al. (40)                           | 196                     | 47                                | 43                   | 58                                   | 74.1% (61% to 84.7%)                         | -6.9% (-23.6% to 10.3%)                                         |
| Migueres, et al. (41)                          | 123                     | 41                                | 37                   | 44                                   | 84.1% (69.9% to 93.4%)                       | -9.1% (-23.8% to 5.6%)                                          |
| <b>Pooled estimate (95% CI); I<sup>2</sup></b> | 3878                    | 859                               | 838                  | 1037                                 | 85.4% (79.3% to 89.9%); I <sup>2</sup> = 80% | -3.7% (-14.8% to 7.3%); I <sup>2</sup> = 90%                    |

**Abbreviations:** N: Number, CI: Confidence interval.

\*One study did not report if transport media was used.

Supplement Table 17 | Difference in Sensitivity to SARS-CoV-2 Between Nasopharyngeal Swabs and Saliva, Stratified by Analytical Method Used

| Study                                          | N Paired Samples Tested | N Positive on Nasopharyngeal Swab | N Positive on Saliva | N Positive on Any Sample (Reference) | Sensitivity Saliva (95% CI)                        | Difference in Sensitivity (95% CI) [Saliva-Nasopharyngeal swab] |
|------------------------------------------------|-------------------------|-----------------------------------|----------------------|--------------------------------------|----------------------------------------------------|-----------------------------------------------------------------|
| <b>Lab Based RT-PCR (N=34)</b>                 |                         |                                   |                      |                                      |                                                    |                                                                 |
| Azzi, et al. (5)                               | 113                     | 26                                | 55                   | 59                                   | 93.2% (83.5% to 98.1%)                             | 49.2% (31.3% to 62.9%)                                          |
| Leung, et al. (7)                              | 95                      | 45                                | 51                   | 58                                   | 87.9% (76.7% to 95%)                               | 10.3% (-4.9% to 25.1%)                                          |
| Rao, et al. (9)                                | 217                     | 84                                | 149                  | 160                                  | 93.1% (88% to 96.5%)                               | 40.6% (30.5% to 49.6%)                                          |
| Landry, et al. (10)                            | 124                     | 33                                | 30                   | 35                                   | 85.7% (69.7% to 95.2%)                             | -8.6% (-24.6% to 7.3%)                                          |
| Villar, et al. (11)                            | 13                      | 9                                 | 7                    | 9                                    | 77.8% (40% to 97.2%)                               | -22.2% (-54.7% to 11.7%)                                        |
| Akgun Dogan, et al. (12)                       | 200                     | 58                                | 36                   | 63                                   | 57.1% (44% to 69.5%)                               | -34.9% (-49% to -18.4%)                                         |
| Becker, et al. (13)                            | 109                     | 21                                | 15                   | 30                                   | 50% (31.3% to 68.7%)                               | -20% (-47.5% to 11.6%)                                          |
| Byrne, et al. (14)                             | 110                     | 14                                | 12                   | 14                                   | 85.7% (57.2% to 98.2%)                             | -14.3% (-39.9% to 9.6%)                                         |
| Griesemer, et al. (15)                         | 463                     | 103                               | 87                   | 105                                  | 82.9% (74.3% to 89.5%)                             | -15.2% (-23.8% to -7.3%)                                        |
| Iwasaki, et al. (17)                           | 76                      | 9                                 | 9                    | 10                                   | 90% (55.5% to 99.7%)                               | 0% (-32.4% to 32.4%)                                            |
| Jamal, et al. (18)                             | 91                      | 64                                | 52                   | 72                                   | 72.2% (60.4% to 82.1%)                             | -16.7% (-30.2% to -2.4%)                                        |
| Miller, et al. (19)                            | 91                      | 34                                | 35                   | 36                                   | 97.2% (85.5% to 99.9%)                             | 2.8% (-9.5% to 15.7%)                                           |
| Pasomsub, et al. (20)                          | 200                     | 19                                | 18                   | 21                                   | 85.7% (63.7% to 97%)                               | -4.8% (-27.1% to 17.8%)                                         |
| Ranoa, et al. (21)                             | 99                      | 9                                 | 9                    | 9                                    | 100% (66.4% to 100%)                               | 0% (-29.9% to 29.9%)                                            |
| Wyllie, et al. (22)                            | 97                      | 56                                | 60                   | 72                                   | 83.3% (72.7% to 91.1%)                             | 5.6% (-8.9% to 19.7%)                                           |
| Bhattacharya, et al. (23)                      | 74                      | 58                                | 53                   | 58                                   | 91.4% (81% to 97.1%)                               | -8.6% (-18.6% to -0.7%)                                         |
| Goldfarb, et al. (24)                          | 38                      | 28                                | 23                   | 29                                   | 79.3% (60.3% to 92%)                               | -17.2% (-35.4% to 1.1%)                                         |
| Ku, et al. (25)                                | 42                      | 30                                | 21                   | 31                                   | 67.7% (48.6% to 83.3%)                             | -29% (-47.2% to -9%)                                            |
| Nacher, et al. (26)                            | 776                     | 152                               | 86                   | 162                                  | 53.1% (45.1% to 61%)                               | -40.7% (-49.5% to -30.9%)                                       |
| Sahajpal, et al. (27)                          | 240                     | 61                                | 34                   | 68                                   | 50% (37.6% to 62.4%)                               | -39.7% (-53.9% to -22.5%)                                       |
| Teo, et al. (28)                               | 337                     | 150                               | 209                  | 220                                  | 95% (91.2% to 97.5%)                               | 26.8% (19.4% to 33.9%)                                          |
| Yee, et al. (29)                               | 300                     | 87                                | 79                   | 97                                   | 81.4% (72.3% to 88.6%)                             | -8.2% (-18.9% to 2.5%)                                          |
| Yokota, et al. (30)                            | 42                      | 34                                | 38                   | 38                                   | 100% (90.7% to 100%)                               | 10.5% (-0.6% to 24.1%)                                          |
| Yokota, et al. (31)                            | 161                     | 41                                | 44                   | 47                                   | 93.6% (82.5% to 98.7%)                             | 6.4% (-6.9% to 19.9%)                                           |
| Barat, et al. (32)                             | 451                     | 29                                | 26                   | 30                                   | 86.7% (69.3% to 96.2%)                             | -10% (-26.8% to 6.1%)                                           |
| Aita, et al. (33)                              | 43                      | 7                                 | 8                    | 8                                    | 100% (63.1% to 100%)                               | 12.5% (-21.5% to 47.1%)                                         |
| Altawalrah, et al. (34)                        | 891                     | 344                               | 305                  | 362                                  | 84.3% (80.1% to 87.9%)                             | -10.8% (-15.4% to -6.2%)                                        |
| Binder, et al. (35)                            | 19                      | 11                                | 11                   | 12                                   | 91.7% (61.5% to 99.8%)                             | 0% (-28.5% to 28.5%)                                            |
| Caulley, et al. (36)                           | 272                     | 8                                 | 11                   | 13                                   | 84.6% (54.6% to 98.1%)                             | 23.1% (-16% to 54.6%)                                           |
| Kojima, et al. (37)                            | 45                      | 23                                | 26                   | 29                                   | 89.7% (72.6% to 97.8%)                             | 10.3% (-10.5% to 30.4%)                                         |
| Procop, et al. (38)                            | 216                     | 38                                | 39                   | 39                                   | 100% (91% to 100%)                                 | 2.6% (-6.6% to 13.2%)                                           |
| Senok, et al. (39)                             | 401                     | 26                                | 28                   | 35                                   | 80% (63.1% to 91.6%)                               | 5.7% (-16.5% to 27.2%)                                          |
| Uwamino, et al. (40)                           | 196                     | 47                                | 43                   | 58                                   | 74.1% (61% to 84.7%)                               | -6.9% (-23.6% to 10.3%)                                         |
| Migueres, et al. (41)                          | 123                     | 41                                | 37                   | 44                                   | 84.1% (69.9% to 93.4%)                             | -9.1% (-23.8% to 5.6%)                                          |
| <b>Pooled estimate (95% CI); I<sup>2</sup></b> | <b>6765</b>             | <b>1799</b>                       | <b>1746</b>          | <b>0</b>                             | <b>85.9% (80.9% to 89.8%); I<sup>2</sup> = 87%</b> | <b>-3.6% (-10.7% to 3.6%); I<sup>2</sup> = 89%</b>              |

| Study                                          | N Paired Samples Tested | N Positive on Nasopharyngeal Swab | N Positive on Saliva | N Positive on Any Sample (Reference) | Sensitivity Saliva (95% CI)                 | Difference in Sensitivity (95% CI) [Saliva-Nasopharyngeal swab] |
|------------------------------------------------|-------------------------|-----------------------------------|----------------------|--------------------------------------|---------------------------------------------|-----------------------------------------------------------------|
| <b>Other Molecular Method (N=3)</b>            |                         |                                   |                      |                                      |                                             |                                                                 |
| Chen, et al. (6)*                              | 58                      | 55                                | 52                   | 58                                   | 89.7% (78.8% to 96.1%)                      | -5.2% (-16.4% to 5.7%)                                          |
| McCormick-Baw, et al. (8)*                     | 155                     | 49                                | 48                   | 50                                   | 96% (86.3% to 99.5%)                        | -2% (-11.6% to 7.1%)                                            |
| Hanson, et al. (16)†                           | 354                     | 80                                | 81                   | 86                                   | 94.2% (87% to 98.1%)                        | 1.2% (-7.1% to 9.5%)                                            |
| <b>Pooled estimate (95% CI); I<sup>2</sup></b> | 567                     | 184                               | 181                  | 194                                  | 93.3% (88.8% to 96.1%); I <sup>2</sup> = 0% | -1.4% (-9.1% to 6.3%); I <sup>2</sup> = 8%                      |

**Abbreviations:** N: Number, RT-PCR: Reverse transcription polymerase chain reaction, CI: Confidence Interval.

**Notes** \*Point of care test, †Transcription-mediated amplification



Supplement Table 18 | Difference in Sensitivity to SARS-CoV-2 Between Nasopharyngeal Swabs and Saliva, Stratified by Study Design

| Study                     | N Paired Samples Tested | N Positive on Nasopharyngeal Swab | N Positive on Saliva | N Positive on Any Sample (Reference) | Sensitivity Saliva (95% CI) | Difference in Sensitivity (95% CI) [Saliva-Nasopharyngeal swab] |
|---------------------------|-------------------------|-----------------------------------|----------------------|--------------------------------------|-----------------------------|-----------------------------------------------------------------|
| <b>Cohorts (N=35)</b>     |                         |                                   |                      |                                      |                             |                                                                 |
| Azzi, et al. (5)          | 113                     | 26                                | 55                   | 59                                   | 93.2% (83.5% to 98.1%)      | 49.2% (31.3% to 62.9%)                                          |
| Chen, et al. (6)          | 58                      | 55                                | 52                   | 58                                   | 89.7% (78.8% to 96.1%)      | -5.2% (-16.4% to 5.7%)                                          |
| McCormick-Baw, et al. (8) | 155                     | 49                                | 48                   | 50                                   | 96% (86.3% to 99.5%)        | -2% (-11.6% to 7.1%)                                            |
| Rao, et al. (9)           | 217                     | 84                                | 149                  | 160                                  | 93.1% (88% to 96.5%)        | 40.6% (30.5% to 49.6%)                                          |
| Landry, et al. (10)       | 124                     | 33                                | 30                   | 35                                   | 85.7% (69.7% to 95.2%)      | -8.6% (-24.6% to 7.3%)                                          |
| Villar, et al. (11)       | 13                      | 9                                 | 7                    | 9                                    | 77.8% (40% to 97.2%)        | -22.2% (-54.7% to 11.7%)                                        |
| Akgun Dogan, et al. (12)  | 200                     | 58                                | 36                   | 63                                   | 57.1% (44% to 69.5%)        | -34.9% (-49% to -18.4%)                                         |
| Becker, et al. (13)       | 109                     | 21                                | 15                   | 30                                   | 50% (31.3% to 68.7%)        | -20% (-47.5% to 11.6%)                                          |
| Byrne, et al. (14)        | 110                     | 14                                | 12                   | 14                                   | 85.7% (57.2% to 98.2%)      | -14.3% (-39.9% to 9.6%)                                         |
| Griesemer, et al. (15)    | 463                     | 103                               | 87                   | 105                                  | 82.9% (74.3% to 89.5%)      | -15.2% (-23.8% to -7.3%)                                        |
| Hanson, et al. (16)       | 354                     | 80                                | 81                   | 86                                   | 94.2% (87% to 98.1%)        | 1.2% (-7.1% to 9.5%)                                            |
| Iwasaki, et al. (17)      | 76                      | 9                                 | 9                    | 10                                   | 90% (55.5% to 99.7%)        | 0% (-32.4% to 32.4%)                                            |
| Jamal, et al. (18)        | 91                      | 64                                | 52                   | 72                                   | 72.2% (60.4% to 82.1%)      | -16.7% (-30.2% to -2.4%)                                        |
| Miller, et al. (19)       | 91                      | 34                                | 35                   | 36                                   | 97.2% (85.5% to 99.9%)      | 2.8% (-9.5% to 15.7%)                                           |
| Pasomsub, et al. (20)     | 200                     | 19                                | 18                   | 21                                   | 85.7% (63.7% to 97%)        | -4.8% (-27.1% to 17.8%)                                         |
| Ranoa, et al. (21)        | 99                      | 9                                 | 9                    | 9                                    | 100% (66.4% to 100%)        | 0% (-29.9% to 29.9%)                                            |
| Wyllie, et al. (22)       | 97                      | 56                                | 60                   | 72                                   | 83.3% (72.7% to 91.1%)      | 5.6% (-8.9% to 19.7%)                                           |
| Bhattacharya, et al. (23) | 74                      | 58                                | 53                   | 58                                   | 91.4% (81% to 97.1%)        | -8.6% (-18.6% to -0.7%)                                         |
| Goldfarb, et al. (24)     | 38                      | 28                                | 23                   | 29                                   | 79.3% (60.3% to 92%)        | -17.2% (-35.4% to 1.1%)                                         |
| Ku, et al. (25)           | 42                      | 30                                | 21                   | 31                                   | 67.7% (48.6% to 83.3%)      | -29% (-47.2% to -9%)                                            |
| Nacher, et al. (26)       | 776                     | 152                               | 86                   | 162                                  | 53.1% (45.1% to 61%)        | -40.7% (-49.5% to -30.9%)                                       |
| Sahajpal, et al. (27)     | 240                     | 61                                | 34                   | 68                                   | 50% (37.6% to 62.4%)        | -39.7% (-53.9% to -22.5%)                                       |
| Teo, et al. (28)          | 337                     | 150                               | 209                  | 220                                  | 95% (91.2% to 97.5%)        | 26.8% (19.4% to 33.9%)                                          |
| Yee, et al. (29)          | 300                     | 87                                | 79                   | 97                                   | 81.4% (72.3% to 88.6%)      | -8.2% (-18.9% to 2.5%)                                          |
| Yokota, et al. (30)       | 42                      | 34                                | 38                   | 38                                   | 100% (90.7% to 100%)        | 10.5% (-0.6% to 24.1%)                                          |
| Yokota, et al. (31)       | 161                     | 41                                | 44                   | 47                                   | 93.6% (82.5% to 98.7%)      | 6.4% (-6.9% to 19.9%)                                           |
| Barat, et al. (32)        | 451                     | 29                                | 26                   | 30                                   | 86.7% (69.3% to 96.2%)      | -10% (-26.8% to 6.1%)                                           |
| Aita, et al. (33)         | 43                      | 7                                 | 8                    | 8                                    | 100% (63.1% to 100%)        | 12.5% (-21.5% to 47.1%)                                         |
| Altawalrah, et al. (34)   | 891                     | 344                               | 305                  | 362                                  | 84.3% (80.1% to 87.9%)      | -10.8% (-15.4% to -6.2%)                                        |
| Binder, et al. (35)       | 19                      | 11                                | 11                   | 12                                   | 91.7% (61.5% to 99.8%)      | 0% (-28.5% to 28.5%)                                            |
| Caulley, et al. (36)      | 272                     | 8                                 | 11                   | 13                                   | 84.6% (54.6% to 98.1%)      | 23.1% (-16% to 54.6%)                                           |
| Procop, et al. (38)       | 216                     | 38                                | 39                   | 39                                   | 100% (91% to 100%)          | 2.6% (-6.6% to 13.2%)                                           |
| Senok, et al. (39)        | 401                     | 26                                | 28                   | 35                                   | 80% (63.1% to 91.6%)        | 5.7% (-16.5% to 27.2%)                                          |
| Uwamino, et al. (40)      | 196                     | 47                                | 43                   | 58                                   | 74.1% (61% to 84.7%)        | -6.9% (-23.6% to 10.3%)                                         |
| Migueres, et al. (41)     | 123                     | 41                                | 37                   | 44                                   | 84.1% (69.9% to 93.4%)      | -9.1% (-23.8% to 5.6%)                                          |

| Study                                          | N Paired Samples Tested | N Positive on Nasopharyngeal Swab | N Positive on Saliva | N Positive on Any Sample (Reference) | Sensitivity Saliva (95% CI)                  | Difference in Sensitivity (95% CI) [Saliva-Nasopharyngeal swab] |
|------------------------------------------------|-------------------------|-----------------------------------|----------------------|--------------------------------------|----------------------------------------------|-----------------------------------------------------------------|
| <b>Pooled estimate (95% CI); I<sup>2</sup></b> | 7192                    | 1915                              | 1850                 | 2240                                 | 86.8% (81.9% to 90.5%); I <sup>2</sup> = 87% | -4.2% (-11% to 2.6%); I <sup>2</sup> = 89%                      |
| <b>Case-Control (N=2)</b>                      |                         |                                   |                      |                                      |                                              |                                                                 |
| Leung, et al. (7)                              | 95                      | 45                                | 51                   | 58                                   | 87.9% (76.7% to 95%)                         | 10.3% (-4.9% to 25.1%)                                          |
| Kojima, et al. (37)                            | 45                      | 23                                | 26                   | 29                                   | 89.7% (72.6% to 97.8%)                       | 10.3% (-10.5% to 30.4%)                                         |

**Abbreviations:** N: Number, CI: Confidence Interval

Supplement Table 19 | Difference in Sensitivity to SARS-CoV-2 Between Nasopharyngeal Swabs and Saliva, Stratified by Quality Assessment

| Study                                                     | N Paired Samples Tested | N Positive on Nasopharyngeal Swab | N Positive on Saliva | N Positive on Any Sample (Reference) | Sensitivity Saliva (95% CI)                        | Difference in Sensitivity (95% CI) [Saliva-Nasopharyngeal swab] |
|-----------------------------------------------------------|-------------------------|-----------------------------------|----------------------|--------------------------------------|----------------------------------------------------|-----------------------------------------------------------------|
| <b>Scored ≥ 4 Points Across All Seven Domains (N=31)</b>  |                         |                                   |                      |                                      |                                                    |                                                                 |
| Azzi, et al. (5)                                          | 113                     | 26                                | 55                   | 59                                   | 93.2% (83.5% to 98.1%)                             | 49.2% (31.3% to 62.9%)                                          |
| McCormick-Baw, et al. (8)                                 | 155                     | 49                                | 48                   | 50                                   | 96% (86.3% to 99.5%)                               | -2% (-11.6% to 7.1%)                                            |
| Rao, et al. (9)                                           | 217                     | 84                                | 149                  | 160                                  | 93.1% (88% to 96.5%)                               | 40.6% (30.5% to 49.6%)                                          |
| Landry, et al. (10)                                       | 124                     | 33                                | 30                   | 35                                   | 85.7% (69.7% to 95.2%)                             | -8.6% (-24.6% to 7.3%)                                          |
| Villar, et al. (11)                                       | 13                      | 9                                 | 7                    | 9                                    | 77.8% (40% to 97.2%)                               | -22.2% (-54.7% to 11.7%)                                        |
| Akgun Dogan, et al. (12)                                  | 200                     | 58                                | 36                   | 63                                   | 57.1% (44% to 69.5%)                               | -34.9% (-49% to -18.4%)                                         |
| Becker, et al. (13)                                       | 109                     | 21                                | 15                   | 30                                   | 50% (31.3% to 68.7%)                               | -20% (-47.5% to 11.6%)                                          |
| Byrne, et al. (14)                                        | 110                     | 14                                | 12                   | 14                                   | 85.7% (57.2% to 98.2%)                             | -14.3% (-39.9% to 9.6%)                                         |
| Griesemer, et al. (15)                                    | 463                     | 103                               | 87                   | 105                                  | 82.9% (74.3% to 89.5%)                             | -15.2% (-23.8% to -7.3%)                                        |
| Hanson, et al. (16)                                       | 354                     | 80                                | 81                   | 86                                   | 94.2% (87% to 98.1%)                               | 1.2% (-7.1% to 9.5%)                                            |
| Iwasaki, et al. (17)                                      | 76                      | 9                                 | 9                    | 10                                   | 90% (55.5% to 99.7%)                               | 0% (-32.4% to 32.4%)                                            |
| Jamal, et al. (18)                                        | 91                      | 64                                | 52                   | 72                                   | 72.2% (60.4% to 82.1%)                             | -16.7% (-30.2% to -2.4%)                                        |
| Miller, et al. (19)                                       | 91                      | 34                                | 35                   | 36                                   | 97.2% (85.5% to 99.9%)                             | 2.8% (-9.5% to 15.7%)                                           |
| Pasomsub, et al. (20)                                     | 200                     | 19                                | 18                   | 21                                   | 85.7% (63.7% to 97%)                               | -4.8% (-27.1% to 17.8%)                                         |
| Bhattacharya, et al. (23)                                 | 74                      | 58                                | 53                   | 58                                   | 91.4% (81% to 97.1%)                               | -8.6% (-18.6% to -0.7%)                                         |
| Ku, et al. (25)                                           | 42                      | 30                                | 21                   | 31                                   | 67.7% (48.6% to 83.3%)                             | -29% (-47.2% to -9%)                                            |
| Nacher, et al. (26)                                       | 776                     | 152                               | 86                   | 162                                  | 53.1% (45.1% to 61%)                               | -40.7% (-49.5% to -30.9%)                                       |
| Sahajpal, et al. (27)                                     | 240                     | 61                                | 34                   | 68                                   | 50% (37.6% to 62.4%)                               | -39.7% (-53.9% to -22.5%)                                       |
| Teo, et al. (28)                                          | 337                     | 150                               | 209                  | 220                                  | 95% (91.2% to 97.5%)                               | 26.8% (19.4% to 33.9%)                                          |
| Yee, et al. (29)                                          | 300                     | 87                                | 79                   | 97                                   | 81.4% (72.3% to 88.6%)                             | -8.2% (-18.9% to 2.5%)                                          |
| Yokota, et al. (30)                                       | 42                      | 34                                | 38                   | 38                                   | 100% (90.7% to 100%)                               | 10.5% (-0.6% to 24.1%)                                          |
| Yokota, et al. (31)                                       | 161                     | 41                                | 44                   | 47                                   | 93.6% (82.5% to 98.7%)                             | 6.4% (-6.9% to 19.9%)                                           |
| Barat, et al. (32)                                        | 451                     | 29                                | 26                   | 30                                   | 86.7% (69.3% to 96.2%)                             | -10% (-26.8% to 6.1%)                                           |
| Altawalah, et al. (34)                                    | 891                     | 344                               | 305                  | 362                                  | 84.3% (80.1% to 87.9%)                             | -10.8% (-15.4% to -6.2%)                                        |
| Binder, et al. (35)                                       | 19                      | 11                                | 11                   | 12                                   | 91.7% (61.5% to 99.8%)                             | 0% (-28.5% to 28.5%)                                            |
| Caulley, et al. (36)                                      | 272                     | 8                                 | 11                   | 13                                   | 84.6% (54.6% to 98.1%)                             | 23.1% (-16% to 54.6%)                                           |
| Kojima, et al. (37)                                       | 45                      | 23                                | 26                   | 29                                   | 89.7% (72.6% to 97.8%)                             | 10.3% (-10.5% to 30.4%)                                         |
| Procop, et al. (38)                                       | 216                     | 38                                | 39                   | 39                                   | 100% (91% to 100%)                                 | 2.6% (-6.6% to 13.2%)                                           |
| Senok, et al. (39)                                        | 401                     | 26                                | 28                   | 35                                   | 80% (63.1% to 91.6%)                               | 5.7% (-16.5% to 27.2%)                                          |
| Uwamino, et al. (40)                                      | 196                     | 47                                | 43                   | 58                                   | 74.1% (61% to 84.7%)                               | -6.9% (-23.6% to 10.3%)                                         |
| Migueres, et al. (41)                                     | 123                     | 41                                | 37                   | 44                                   | 84.1% (69.9% to 93.4%)                             | -9.1% (-23.8% to 5.6%)                                          |
| <b>Pooled estimate (95% CI); I<sup>2</sup></b>            | <b>6902</b>             | <b>1783</b>                       | <b>1724</b>          | <b>2093</b>                          | <b>86.5% (81.1% to 90.5%); I<sup>2</sup> = 89%</b> | <b>-4.1% (-11.7% to 3.5%); I<sup>2</sup> = 91%</b>              |
| <b>Score &lt; 4 Points Across All Seven Domains (N=6)</b> |                         |                                   |                      |                                      |                                                    |                                                                 |
| Chen, et al. (6)                                          | 58                      | 55                                | 52                   | 58                                   | 89.7% (78.8% to 96.1%)                             | -5.2% (-16.4% to 5.7%)                                          |
| Leung, et al. (7)                                         | 95                      | 45                                | 51                   | 58                                   | 87.9% (76.7% to 95%)                               | 10.3% (-4.9% to 25.1%)                                          |

| Study                                          | N Paired Samples Tested | N Positive on Nasopharyngeal Swab | N Positive on Saliva | N Positive on Any Sample (Reference) | Sensitivity Saliva (95% CI)                 | Difference in Sensitivity (95% CI) [Saliva-Nasopharyngeal swab] |
|------------------------------------------------|-------------------------|-----------------------------------|----------------------|--------------------------------------|---------------------------------------------|-----------------------------------------------------------------|
| Ranoa, et al. (21)                             | 99                      | 9                                 | 9                    | 9                                    | 100% (66.4% to 100%)                        | 0% (-29.9% to 29.9%)                                            |
| Wyllie, et al. (22)                            | 97                      | 56                                | 60                   | 72                                   | 83.3% (72.7% to 91.1%)                      | 5.6% (-8.9% to 19.7%)                                           |
| Goldfarb, et al. (24)                          | 38                      | 28                                | 23                   | 29                                   | 79.3% (60.3% to 92%)                        | -17.2% (-35.4% to 1.1%)                                         |
| Aita, et al. (33)                              | 43                      | 7                                 | 8                    | 8                                    | 100% (63.1% to 100%)                        | 12.5% (-21.5% to 47.1%)                                         |
| <b>Pooled estimate (95% CI); I<sup>2</sup></b> | 430                     | 200                               | 203                  | 234                                  | 86.8% (81.8% to 90.5%); I <sup>2</sup> = 0% | -0.1% (-11.4% to 11.2%); I <sup>2</sup> = 44%                   |

**Abbreviations:** N: Number, CI: confidence interval

Supplement Table 20 | How the Incremental Cost per Additional SARS-CoV-2 Infection Identified Varies with Difference in Sampling Method Sensitivity and Prevalence of SARS-CoV-2

| Prevalence of SARS-CoV-2 in Sampled Population | Difference in Sampling Method Sensitivity [Nasopharyngeal – Saliva] | Difference in Cost per 100,000 Persons Sampled (2020 \$USD) [Nasopharyngeal – Saliva] | Additional SARS-CoV-2 Infections Identified per 100,000 Persons Sampled [Nasopharyngeal – Saliva] | Incremental Cost per Additional SARS-CoV-2 Infection Identified [Nasopharyngeal – Saliva] |
|------------------------------------------------|---------------------------------------------------------------------|---------------------------------------------------------------------------------------|---------------------------------------------------------------------------------------------------|-------------------------------------------------------------------------------------------|
| 0.01%                                          | 1%                                                                  | \$633,000                                                                             | 0.1                                                                                               | \$6,330,000                                                                               |
|                                                | 2%                                                                  | \$633,000                                                                             | 0.2                                                                                               | \$3,165,000                                                                               |
|                                                | 5%                                                                  | \$633,000                                                                             | 0.5                                                                                               | \$1,266,000                                                                               |
|                                                | 10%                                                                 | \$633,000                                                                             | 1                                                                                                 | \$633,000                                                                                 |
|                                                | 20%                                                                 | \$633,000                                                                             | 2                                                                                                 | \$316,500                                                                                 |
| 0.1%                                           | 1%                                                                  | \$633,000                                                                             | 1                                                                                                 | \$633,000                                                                                 |
|                                                | 2%                                                                  | \$633,000                                                                             | 2                                                                                                 | \$316,500                                                                                 |
|                                                | 5%                                                                  | \$633,000                                                                             | 5                                                                                                 | \$126,600                                                                                 |
|                                                | 10%                                                                 | \$633,000                                                                             | 10                                                                                                | \$63,300                                                                                  |
|                                                | 20%                                                                 | \$633,000                                                                             | 20                                                                                                | \$31,650                                                                                  |
| 1%                                             | 1%                                                                  | \$633,000                                                                             | 10                                                                                                | \$63,300                                                                                  |
|                                                | 2%                                                                  | \$633,000                                                                             | 20                                                                                                | \$31,650                                                                                  |
|                                                | 5%                                                                  | \$633,000                                                                             | 50                                                                                                | \$12,660                                                                                  |
|                                                | 10%                                                                 | \$633,000                                                                             | 100                                                                                               | \$6,330                                                                                   |
|                                                | 20%                                                                 | \$633,000                                                                             | 200                                                                                               | \$3,165                                                                                   |
| 10%                                            | 1%                                                                  | \$633,000                                                                             | 100                                                                                               | \$6,330                                                                                   |
|                                                | 2%                                                                  | \$633,000                                                                             | 200                                                                                               | \$3,165                                                                                   |
|                                                | 5%                                                                  | \$633,000                                                                             | 500                                                                                               | \$1,266                                                                                   |
|                                                | 10%                                                                 | \$633,000                                                                             | 1000                                                                                              | \$633                                                                                     |
|                                                | 20%                                                                 | \$633,000                                                                             | 2000                                                                                              | \$317                                                                                     |

Supplement Figure 1 | Quality Assessment of Included Studies

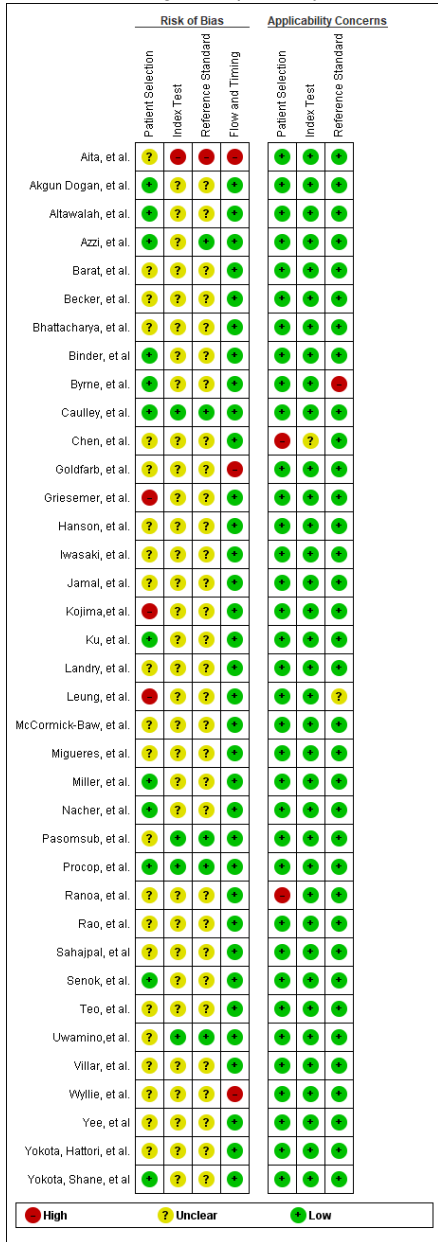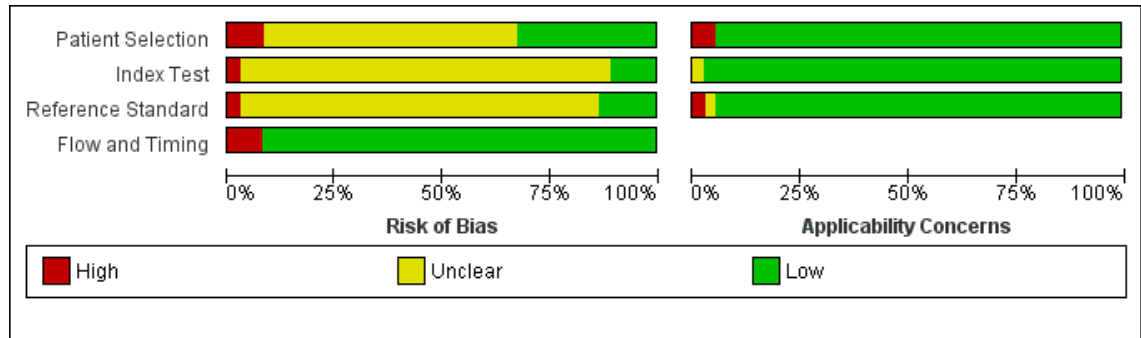

Supplement Figure 2 | Cost-Effectiveness Plane, Nasopharyngeal Swabs versus Saliva Sampling

Cost-Effectiveness Plane, Nasopharyngeal Swabs versus Saliva Sampling<sup>1,2</sup>

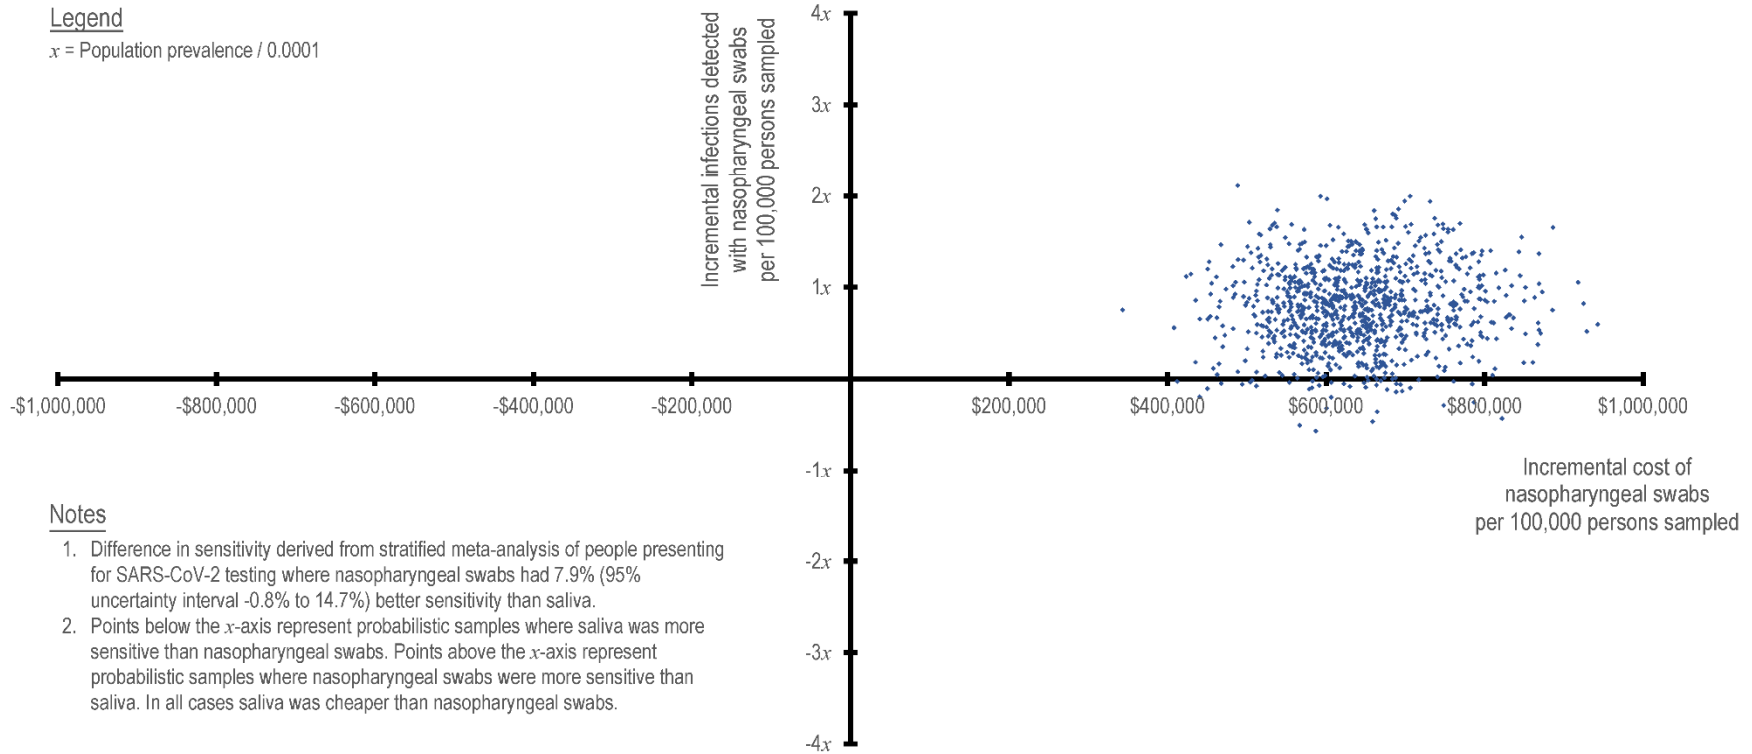

## References

1. Government of Canada. Job Bank: Wages. 2020. Available at: <https://www.jobbank.gc.ca/trend-analysis/search-wages> (Accessed 14 May 2020).
2. Campbell JR, Uppal A, Oxlade O, Fregonese F, Bastos ML, Lan Z, et al. Active testing of groups at increased risk of acquiring SARS-CoV-2 in Canada: costs and human resource needs. *CMAJ*. 2020;192(40):E1146-e55.
3. Fisher Scientific. Transwab, Culture Swab, Liquid Culture Swab, Amies Media, Rayon Tipped Swab, Gel Culture Swab. Available at: <https://www.fishersci.ca/shop/products/transwab-liquid-culture-swabs-4/361030259#?keyword=nasopharyngeal> (Accessed 14 September 2020).
4. Fisher Scientific. Globe Scientific Self-Standing Sterile Transport Tubes with Attached Screw Cap. Available at: <https://www.fishersci.ca/shop/products/self-standing-sterile-transport-tubes-attached-screw-cap-2/p-7112516#?keyword=graduated+tube+sterile> (Accessed 14 September 2020).
5. Azzi L, Baj A, Alberio T, Lualdi M, Veronesi G, Carcano G, et al. Rapid Salivary Test suitable for a mass screening program to detect SARS-CoV-2: A diagnostic accuracy study. *Journal of Infection*. 2020;81(3):e75-e78.
6. Chen JHK, Yip CCY, Poon RWS, Chan KH, Cheng VCC, Hung IFN, et al. Evaluating the use of posterior oropharyngeal saliva in a point-of-care assay for the detection of SARS-CoV-2. *Emerging Microbes and Infections*. 2020;9(1):1356-9.
7. Leung ECM, Chow VCY, Lee MKP, Lai RWM. Deep throat saliva as an alternative diagnostic specimen type for the detection of SARS-CoV-2. *Journal of Medical Virology*. 2020. doi: 10.1002/jmv.26258.
8. McCormick-Baw C, Morgan K, Gaffney D, Cazares Y, Jaworski K, Byrd A, et al. Saliva as an Alternate Specimen Source for Detection of SARS-CoV-2 in Symptomatic Patients Using Cepheid Xpert Xpress SARS-CoV-2. *Journal of Clinical Microbiology*. 2020;58(8):23.
9. Rao M, Rashid FA, Sabri F, Jamil NN, Zain R, Hashim R, et al. Comparing nasopharyngeal swab and early morning saliva for the identification of SARS-CoV-2. *Clinical Infectious Diseases*. 2020;ciaa1156. doi: 10.1093/cid/ciaa1156.
10. Landry ML, Criscuolo J, Peaper DR. Challenges in use of saliva for detection of SARS CoV-2 RNA in symptomatic outpatients. *Journal of Clinical Virology*. 2020;130:104567.
11. Villar LM, da Costa VD, Marques BL, da Silva LL, Santos AC, da Fonseca Mendonca AC, et al. Usefulness of saliva samples for detecting SARS-CoV-2 RNA among liver disease patients. *Journal of Infection*. 2020. doi: 10.1016/j.jinf.2020.07.017.
12. Akgun Dogan O, Kose B, Agaoglu NB, Yildiz J, Alkurt G, Kendir Demirkol Y, et al. Does sampling saliva increase detection of SARS-CoV-2 by RT-PCR? Comparing saliva with oronasopharyngeal swabs. *medRxiv*. 2020:2020.07.26.20158618.
13. Becker D, oval E, Amin A, De Hoff P, Diets A, Leonetti N, et al. Saliva is less sensitive than nasopharyngeal swabs for COVID-19 detection in the community setting. *medRxiv*. Preprint posted online 28 July 2020. doi: 10.1101/2020.07.26.20158618.
14. Byrne RL, Kay GA, Kontogianni K, Aljayoussi G, Brown L, Collins AM, et al. Saliva Alternative to Upper Respiratory Swabs for SARS-CoV-2 Diagnosis. *Emerg Infect Dis*. 2020;26(11):2770-1.
15. Griesemer SB, Van Slyke G, Ehrbar D, Strle K, Yildirim T, Centurioni DA, et al. Evaluation of specimen types and saliva stabilization solutions for SARS-CoV-2 testing. *medRxiv*. Preprint posted online 18 June 2020. doi: 10.1101/2020.06.16.20133041.
16. Hanson KE, Barker AP, Hillyard DR, Gilmore N, Barrett JW, Orlandi RR, et al. Self-Collected Anterior Nasal and Saliva Specimens versus Healthcare Worker-Collected Nasopharyngeal Swabs for the Molecular Detection of SARS-CoV-2. *Journal of Clinical Microbiology*. 2020;58(11):e01824-20.
17. Iwasaki S, Fujisawa S, Nakakubo S, Kamada K, Yamashita Y, Fukumoto T, et al. Comparison of SARS-CoV-2 detection in nasopharyngeal swab and saliva. *J Infect*. 2020;81(2):e145-e7.
18. Jamal AJ, Mozafarihashjin M, Coomes E, Powis J, Li AX, Paterson A, et al. Sensitivity of nasopharyngeal swabs and saliva for the detection of severe acute respiratory syndrome coronavirus 2 (SARS-CoV-2). *Clin Infect Dis*. 2020;ciaa848. doi: 10.1093/cid/ciaa848.
19. Miller M, Jansen M, Bisignano A, er, Mahoney S, Wechsberg C, et al. Validation of a Self-administrable, Saliva-based RT-qPCR Test Detecting SARS-CoV-2. *medRxiv*. Preprint posted online 9 June 2020. doi: 10.1101/2020.06.05.20122721.
20. Pasomsub E, Watcharananan SP, Boonyawat K, Janchompoo P, Wongtabtim G, Suksuwan W, et al. Saliva Sample as a Non-Invasive Specimen for the Diagnosis of Coronavirus Disease-2019 (COVID-19): a Cross-Sectional Study. *Clin Microbiol Infect*. 2020. doi: 10.1016/j.cmi.2020.05.001.
21. Ranoa DRE, Holland RL, Alnaji FG, Green KJ, Wang L, et al. Saliva-Based Molecular Testing for SARS-CoV-2 that Bypasses RNA Extraction. *bioRxiv*. Preprint posted online 18 June 2020. doi: 10.1101/2020.06.18.159434.
22. Wyllie AL, Fournier J, Casanovas-Massana A, Campbell M, Tokuyama M, Vijayakumar P, et al. Saliva or Nasopharyngeal Swab Specimens for Detection of SARS-CoV-2. *N Engl J Med*. 2020;383(13):1283-6.



23. Bhattacharya DD, Parai DD, Rout UK, a RR, Kanungo DS, Dash DGC, et al. Saliva as a potential clinical specimen for diagnosis of SARS-CoV-2. medRxiv. Preprint posted online 11 September 2020. doi: 10.1101/2020.09.11.20192591.
24. Goldfarb DM, Tilley P, Al-Rawahi GN, Srigley J, Ford G, Pedersen H, et al. Self-collected Saline Gargle Samples as an Alternative to Healthcare Worker Collected Nasopharyngeal Swabs for COVID-19 Diagnosis in Outpatients. medRxiv. Preprint posted online 14 September 2020. doi: 10.1101/2020.09.13.20188334.
25. Ku CW, Shivani D, Kwan JQT, Loy SL, Erwin C, Ko KKK, et al. Validation of self-collected buccal swab and saliva as a diagnostic tool for COVID-19. medRxiv. Preprint posted online 5 October 2020. doi: 10.1101/2020.10.03.20205278.
26. Nacher M, Mergeay-Fabre M, Blanchet D, Benois O, Pozl T, Mesphoule P, et al. Prospective comparison of saliva and nasopharyngeal swab sampling for mass screening for COVID-19. medRxiv. Preprint posted online 24 September 2020. doi: 10.1101/2020.09.23.20150961.
27. Sahajpal NS, Mondal AK, Ananth S, Njau A, Ahluwalia P, Chaubey A, et al. SalivaAll: Clinical validation of a sensitive test for saliva collected in healthcare and community settings with pooling utility for SARS-CoV-2 mass surveillance. medRxiv. Preprint posted online 1 September 2020. doi: 10.1101/2020.08.26.20182816.
28. Teo AKJ, Choudhury Y, Tan IB, Cher CY, Chew SH, Wan ZY, et al. Validation of Saliva and Self-Administered Nasal Swabs for COVID-19 Testing. medRxiv. Preprint posted online 14 August 2020. doi: 10.1101/2020.08.13.20173807.
29. Yee R, Truong T, Pannaraj PS, Eubanks N, Gai E, Jumarang J, et al. Saliva is a promising alternative specimen for the detection of SARS-CoV-2 in children and adults. medRxiv. Preprint posted online 27 October 2020. doi: 10.1101/2020.10.25.20219055.
30. Yokota I, Hattori T, Shane PY, Konno S, Nagasaka A, Takeyabu K, et al. Equivalent SARS-CoV-2 viral loads between nasopharyngeal swab and saliva in symptomatic patients. medRxiv. Preprint posted online 3 September 2020. doi: 10.1101/2020.09.01.20186254.
31. Yokota I, Shane PY, Okada K, Unoki Y, Yang Y, Inao T, et al. Mass screening of asymptomatic persons for SARS-CoV-2 using saliva. *Clinical Infectious Diseases*. 2020;ciaa1388. doi: 10.1093/cid/ciaa1388.
32. Barat B, Das S, De Giorgi V, Henderson DK, Kopka S, Lau AF, et al. Pooled Saliva Specimens for SARS-CoV-2 Testing. medRxiv. Preprint posted online 5 October 2020. doi: 10.1101/2020.10.02.20204859.
33. Aita A, Basso D, Cattelan AM, Fioretto P, Navaglia F, Barbaro F, et al. SARS-CoV-2 identification and IgA antibodies in saliva: One sample two tests approach for diagnosis. *Clinica Chimica Acta*. 2020;510:717-22.
34. Altawalah H, AlHuraish F, Alk, ari WA, Ezzikouri S. Saliva specimens for detection of severe acute respiratory syndrome coronavirus 2 in Kuwait: A cross-sectional study. *Journal of Clinical Virology*. 2020;132:104652.
35. Binder RA, Alarja NA, Robie ER, Kochev KE, Xiu L, Rocha-Melogno L, et al. Environmental and Aerosolized SARS-CoV-2 Among Hospitalized COVID-19 Patients. *Journal of Infectious Diseases*. 2020;jiaa575. doi: 10.1093/infdis/jiaa575.
36. Caulley L, Corsten M, Eapen L, Whelan J, Angel JB, Antonation K, et al. Salivary Detection of COVID-19. *Annals of Internal Medicine*. 2020;M20-4738. doi: 10.7326/M20-4738.
37. Kojima N, Turner F, Slepnev V, Bacelar A, Deming L, Kodeboyina S, et al. Self-Collected Oral Fluid and Nasal Swab Specimens Demonstrate Comparable Sensitivity to Clinician-Collected Nasopharyngeal Swab Specimens for the Detection of SARS-CoV-2. *Clinical Infectious Diseases*. 2020;ciaa1589. doi: 10.1093/cid/ciaa1589.
38. Procop GW, Shrestha NK, Vogel S, Van Sickle K, Harrington S, Rhoads DD, et al. A Direct Comparison of Enhanced Saliva to Nasopharyngeal Swab for the Detection of SARS-CoV-2 in Symptomatic Patients. *Journal of Clinical Microbiology*. 2020;58(11):21.
39. Senok A, Alsuwaidi H, Atrah Y, Al Ayedi O, Al Zahid J, Han A, et al. Saliva as an Alternative Specimen for Molecular COVID-19 Testing in Community Settings and Population-Based Screening. *Infection & Drug Resistance*. 2020;13:3393-9.
40. Uwamino Y, Nagata M, Aoki W, Fujimori Y, Nakagawa T, Yokota H, et al. Accuracy and stability of saliva as a sample for reverse transcription PCR detection of SARS-CoV-2. *Journal of Clinical Pathology*. 2021;74(1):67-8.
41. Miguères M, Mengelle C, Dimeglio C, Didier A, Alvarez M, Delobel P, et al. Saliva sampling for diagnosing SARS-CoV-2 infections in symptomatic patients and asymptomatic carriers. *Journal of Clinical Virology*. 2020;130:104580.
